# Supplementary material for: RNA Structure Elements Conserved between Mouse and 59 Other Vertebrates
Source: PubMed Central journal article supplement (PMC6116022; doi:10.3390/genes9080392), 2018-08-01
Supplement: genes-09-00392-s001.pdf [file genes-09-00392-s001.pdf]

# Supplementary Materials: Conserved RNA structures in the mouse genome

Bernhard C. Thiel, Roman Ochsenreiter, Veerendra P. Gadekar, Andrea Tanzer, Ivo L. Hofacker

## 1. The input alignment

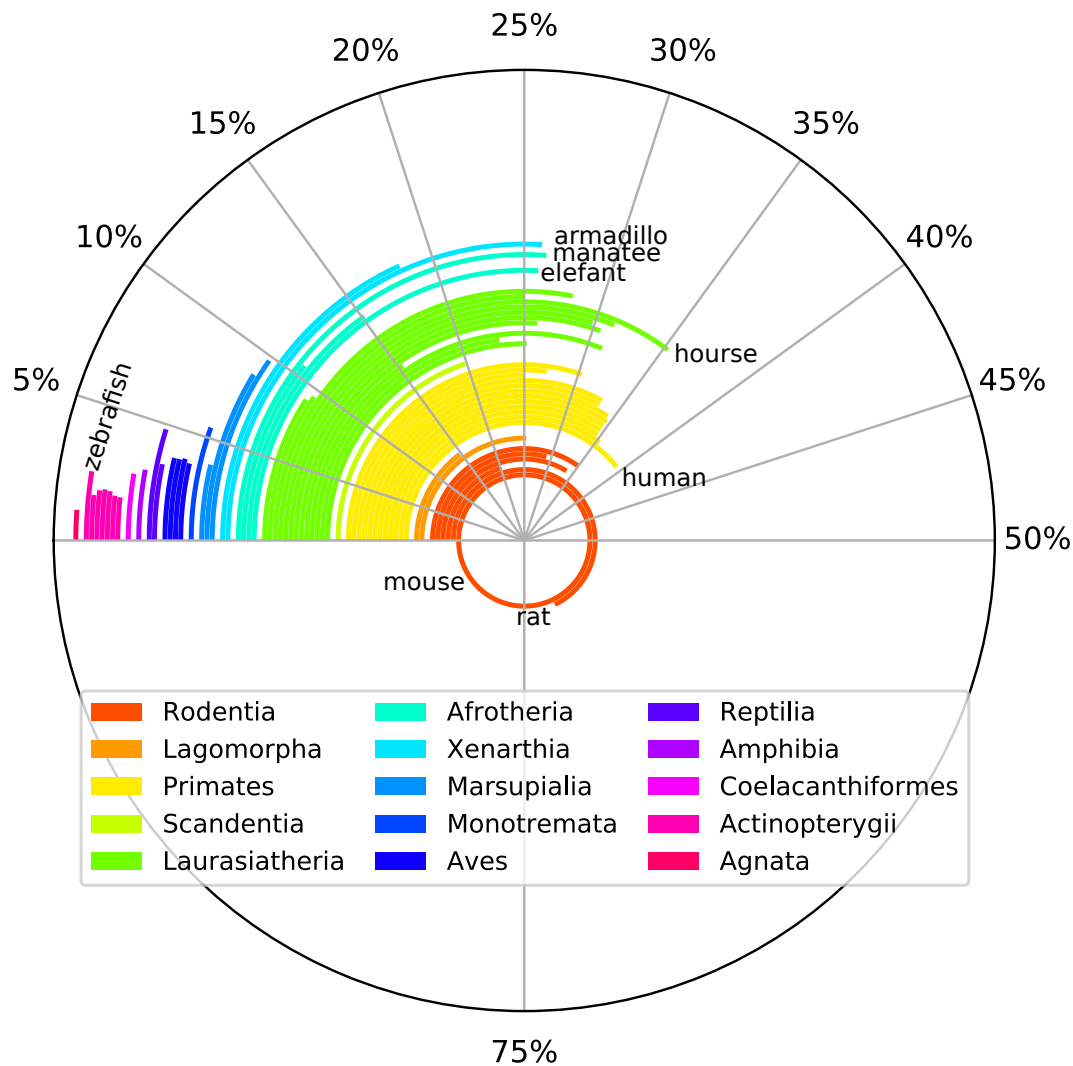

**Figure S1.** Input Alignment Characteristics. For each species, the number of nucleotides from mouse that align with this species is plotted as a fraction of the mouse genome length.

As shown in Figure S1, well studied species with high quality genome assembly are apparently better aligned with mouse in the 60 way multiz input alignment than species with lower genome quality. In particular, we notice that a larger fraction of the mouse genome was aligned with human than with rodents (except for rat). Furthermore there are even alignment blocks which only contain mouse and zebrafish.

This additionally impairs interpretation of our results in terms of conservational deepness.

## 2. The False Discovery Rate (FDR) as a function of the input alignment

Although the rNAz class probability was calibrated to work as consistently as possible for different input alignments, our complex pipeline featuring a realignment step caused the final FDR to be highly dependent on different features of the input alignment. In a recent comparable screen by Seemann et al.[1] the calibration of the cutoff of their CMfinder score was done in a GC-dependent manner based on the FDR estimation. Since the rNAz class probability is reasonable well calibrated for GC content and overfitting has to be avoided, we choose the RNA class probability cutoff only based on the number of species in the alignment.

For the raw rNAz loci, the dependency of the FDR on the number of species (Figure S2) is very strong. The lowest FDR is observed for alignments with 3 to 10 species, where the FDR lies between 20% and 30%. It is known that rNAz due to its dependency on rNAalign has lower specificity if only 2 species are part of the input alignment, an effect which could not be compensated during the SVM calibration. For more than 10 species, we start to sample subsets of 10 species which will be classified by rNAz. Since a raw locus requires only one of 6 samples to be classified as RNA, we get a higher FDR if we sample. Furthermore, as the number of species in the input alignment increases, we can create more diverse samples, thus further increasing the chance to pick up random noise as signal.

We then looked at the FDR for alignments with only two species as a function of RNA class probability cutoff calculated by rNAz (Figure S4). To achieve a FDR comparable to that of alignments with 3 to 10 species and a score cutoff of 0.5, we have to use a score cutoff of 0.99 for alignments with exactly two species.

For more than 10 species in the alignment, we observe that the number of samples which have to be classified as RNA by rNAz has an effect on the FDR (see Figure S3) that outweighs the effect of the score cutoff. If we count everything as hit where at least one or two samples are classified as RNA, we have a high FDR. By requiring at least 5 samples to be rNAz positive, we achieve a better FDR while retaining enough hits.

This leads to the creation of a set of high confidence loci used in the main text.

Due to the realignment steps, the FDR is lowest for loci with low mean pairwise identity (MPI), as shown in Figure S5).

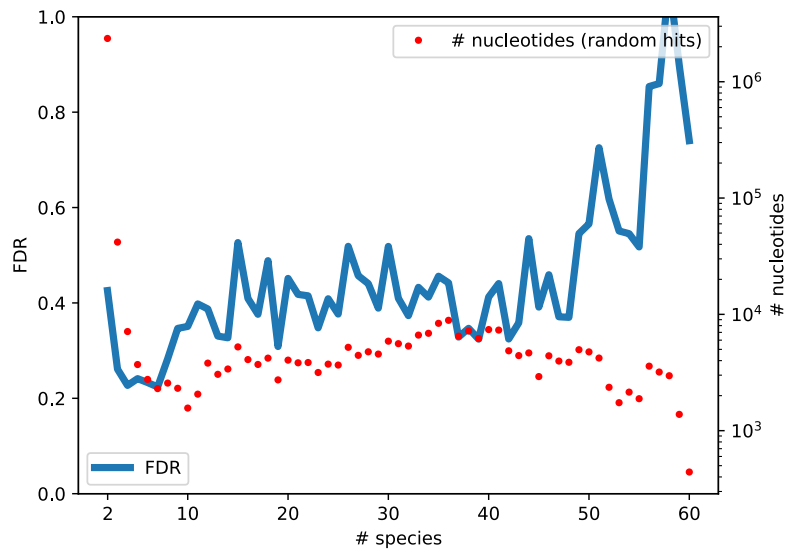

**Figure S2.** The false discovery rate (FDR) of the raw loci as a function of the number of species in the input alignment. The number of RNAz positive nucleotides in our random control for each class is plotted on the secondary axis to give an intuition of the statistical robustness of these results (note that a locus has around 200 nucleotides on average)

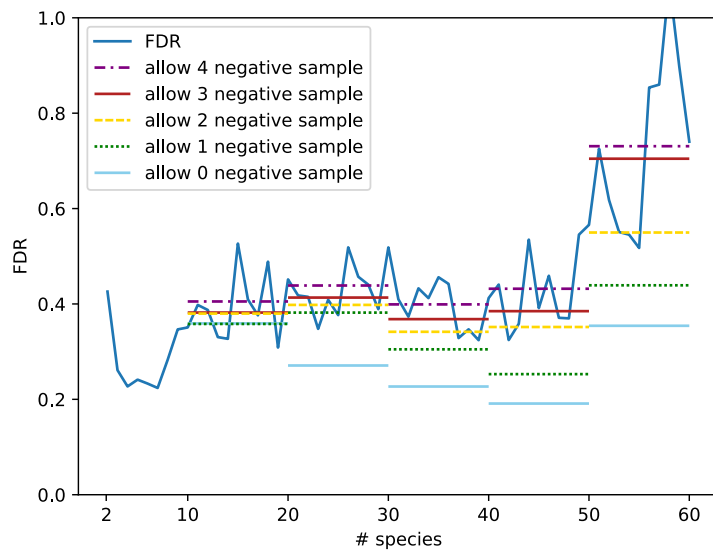

**Figure S3.** The false discovery rate (FDR) as a function of the number of species with different treatment of loci where sequences were sampled. Due to the limited number of data, we bin the data.

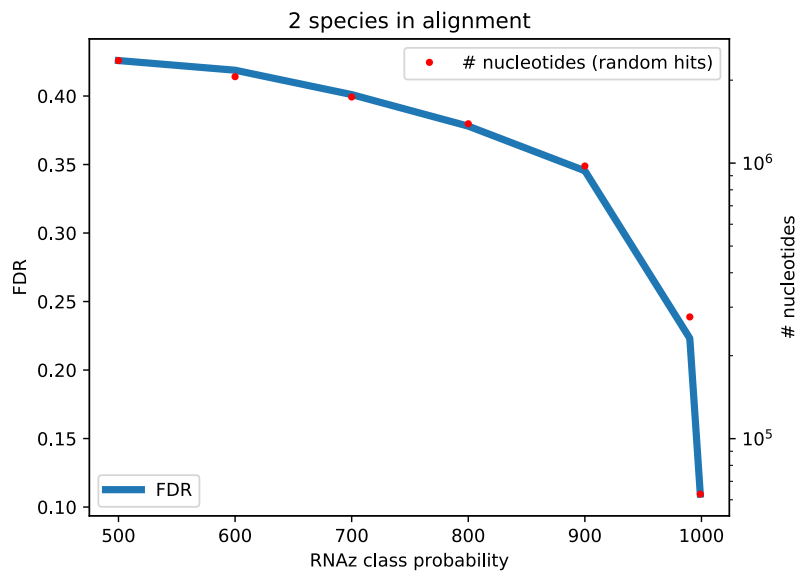

**Figure S4.** The false discovery rate (FDR) for alignments with 2 species as a function of the RNA class probability cutoff (as promille).

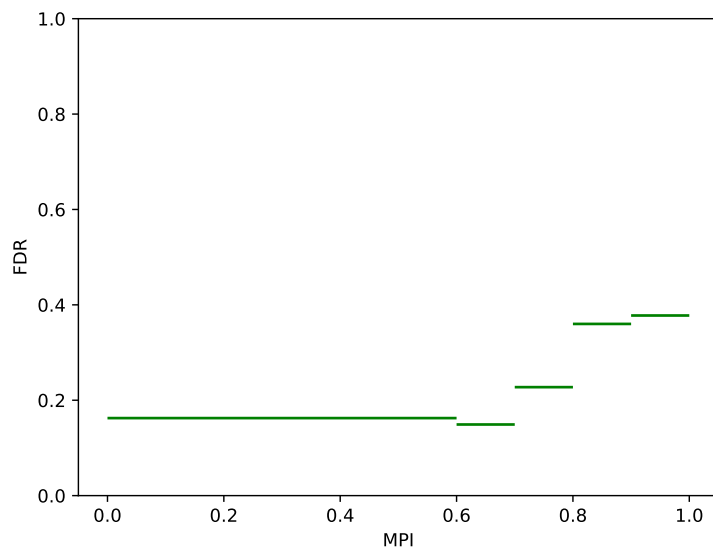

**Figure S5.** The false discovery rate (FDR) of the high confidence loci as a function of the mean pairwise identity (MPI), created using binned data.

### 3. Enrichment of high confidence RNAz hits in the 3'-untranslated region (3'-UTR) for Gene Ontology (GO) terms describing biological process and cellular component

**Table S1.** Enrichment of high confidence RNAz hits in the 3'-untranslated region (3'-UTR) for Gene Ontology (GO) terms describing biological process. **COV\_E:** Enrichment in terms of nucleotides coverage. **CNT\_E:** Enrichment in terms of counts. **p-value** is calculated for the enrichment in counts.

| GO terms                                                               | COV_E   | CNT_E   | p-value                  |
|------------------------------------------------------------------------|---------|---------|--------------------------|
| <b>gene expression</b>                                                 |         |         |                          |
| transcription, DNA-templated                                           | 1.38888 | 1.74526 | $1.9229 \times 10^{-10}$ |
| regulation of transcription, DNA-templated                             | 1.39315 | 1.64643 | $1.9229 \times 10^{-10}$ |
| positive regulation of transcription from RNA polymerase II promoter   | 1.43190 | 1.85313 | $1.5975 \times 10^{-7}$  |
| negative regulation of transcription from RNA polymerase II promoter   | 1.41704 | 1.87274 | $2.8419 \times 10^{-5}$  |
| positive regulation of transcription, DNA-templated                    | 1.40613 | 1.93409 | $2.8026 \times 10^{-4}$  |
| transcription from RNA polymerase II promoter                          | 1.47576 | 2.02047 | $1.9163 \times 10^{-4}$  |
| positive regulation of gene expression                                 | 1.37205 | 1.87336 | $3.2757 \times 10^{-2}$  |
| <b>nervous system process</b>                                          |         |         |                          |
| nervous system development                                             | 1.10095 | 2.01435 | $4.0771 \times 10^{-3}$  |
| axon guidance                                                          | 1.39357 | 2.56867 | $4.3024 \times 10^{-2}$  |
| <b>response to stimulus</b>                                            |         |         |                          |
| response to stimulus                                                   | 0.59064 | 0.52603 | $1.3964 \times 10^{-2}$  |
| detection of chemical stimulus involved in sensory perception of smell | 0.56807 | 0.50006 | $1.3964 \times 10^{-2}$  |
| sensory perception of smell                                            | 0.55678 | 0.50119 | $1.1933 \times 10^{-2}$  |
| G-protein coupled receptor signaling pathway                           | 0.63762 | 0.60856 | $1.0636 \times 10^{-2}$  |
| <b>metabolic process</b>                                               |         |         |                          |
| oxidation-reduction process                                            | 0.65029 | 0.46971 | $3.2757 \times 10^{-2}$  |

**Table S2.** Enrichment of high confidence RNAz hits in the 3'-UTR for GO-terms describing cellular component. **COV\_E:** Enrichment in terms of nucleotides coverage. **CNT\_E:** Enrichment in terms of counts. **p-value** is calculated for the enrichment in counts.

| GO terms                   | COV_E   | CNT_E   | p-value                  |
|----------------------------|---------|---------|--------------------------|
| <b>intracellular part</b>  |         |         |                          |
| cytoplasm                  | 1.11736 | 1.20829 | $4.9443 \times 10^{-4}$  |
| cytosol                    | 1.16312 | 1.31489 | $4.9443 \times 10^{-4}$  |
| cytoplasmic stress granule | 3.01697 | 4.24796 | $5.4124 \times 10^{-3}$  |
| <b>nuclear part</b>        |         |         |                          |
| nucleus                    | 1.24812 | 1.37075 | $4.1530 \times 10^{-12}$ |
| nucleoplasm                | 1.34421 | 1.58915 | $3.6208 \times 10^{-9}$  |
| <b>synapse</b>             |         |         |                          |
| postsynaptic density       | 1.20675 | 2.14592 | $3.0239 \times 10^{-2}$  |
| <b>extracellular</b>       |         |         |                          |
| extracellular region       | 1.01198 | 0.60685 | $1.5071 \times 10^{-3}$  |

#### 4. Example of a locus in a repeat region

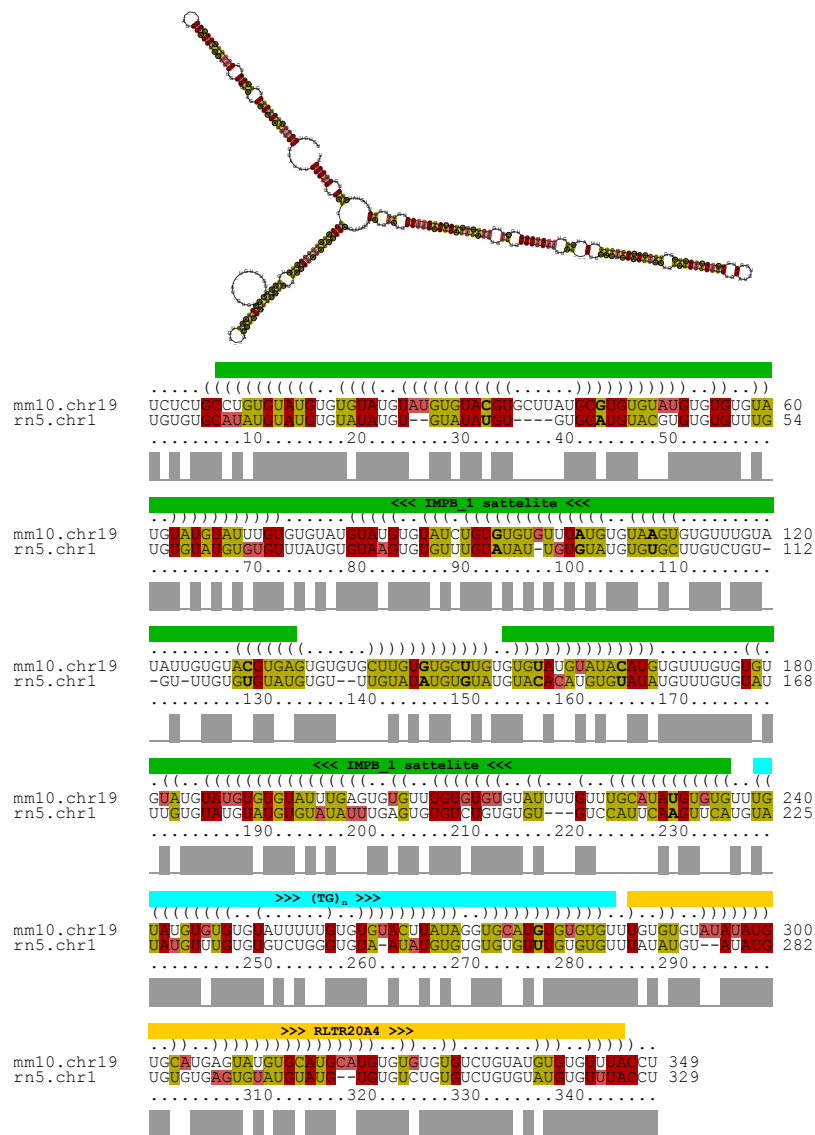

**Figure S6.** Example of a structure with support from covarying basepairs (bold letters in the alignment) that overlaps regions masked as IMPB\_1 satellite repeat[2] and RLTR20A4[3] (Long terminal repeat of retrovirus-like element) located at chromosome 19, nucleotide 31846601 to 31846950 on the forward strand, locus1761533.. The corresponding rat sequence is annotated as two stretches of RLTR20A4 separated by a simple TG repeat.

## **5. Classification of biotypes into sncRNA, lncRNA and other**

**Table S3.** Transcript biotype annotations as per Ensembl Release 92 (April 2018). See [4] for the definition of the used biotypes. We classify noncoding biotypes into 3 categories: long noncoding RNA (lncRNA), short noncoding RNA (sncRNA) and other. This classification was used for Figures 3 and 5 in the main article.

| Class  | Biotypes                           | Number | Total |
|--------|------------------------------------|--------|-------|
| mRNA   | protein_coding                     | 57047  | 57047 |
| lncRNA | processed_transcript               | 15315  | 27964 |
| lncRNA | lincRNA                            | 8224   | 27964 |
| lncRNA | antisense                          | 4164   | 27964 |
| lncRNA | bidirectional_promoter_lincRNA     | 256    | 27964 |
| lncRNA | 3prime_overlapping_ncRNA           | 3      | 27964 |
| lncRNA | macro_lincRNA                      | 2      | 27964 |
| sncRNA | miRNA                              | 2202   | 5500  |
| sncRNA | snoRNA                             | 1507   | 5500  |
| sncRNA | snRNA                              | 1383   | 5500  |
| sncRNA | rRNA                               | 354    | 5500  |
| sncRNA | scaRNA                             | 51     | 5500  |
| sncRNA | sRNA                               | 2      | 5500  |
| sncRNA | scRNA                              | 1      | 5500  |
| other  | retained_intron                    | 20517  | 44633 |
| other  | processed_pseudogene               | 9125   | 44633 |
| other  | nonsense_mediated_decay            | 6593   | 44633 |
| other  | TEC                                | 3189   | 44633 |
| other  | unprocessed_pseudogene             | 2599   | 44633 |
| other  | misc_RNA                           | 566    | 44633 |
| other  | sense_intronic                     | 347    | 44633 |
| other  | IG_V_gene                          | 301    | 44633 |
| other  | transcribed_processed_pseudogene   | 273    | 44633 |
| other  | transcribed_unprocessed_pseudogene | 247    | 44633 |
| other  | TR_V_gene                          | 194    | 44633 |
| other  | IG_V_pseudogene                    | 155    | 44633 |
| other  | pseudogene                         | 95     | 44633 |
| other  | polymorphic_pseudogene             | 93     | 44633 |
| other  | TR_J_gene                          | 70     | 44633 |
| other  | sense_overlapping                  | 53     | 44633 |
| other  | TR_V_pseudogene                    | 34     | 44633 |
| other  | non_stop_decay                     | 25     | 44633 |
| other  | ribozyme                           | 22     | 44633 |
| other  | unitary_pseudogene                 | 21     | 44633 |
| other  | IG_C_gene                          | 21     | 44633 |
| other  | IG_D_gene                          | 19     | 44633 |
| other  | transcribed_unitary_pseudogene     | 14     | 44633 |
| other  | IG_J_gene                          | 14     | 44633 |
| other  | translated_processed_pseudogene    | 12     | 44633 |
| other  | TR_C_gene                          | 10     | 44633 |
| other  | TR_J_pseudogene                    | 10     | 44633 |
| other  | IG_LV_gene                         | 4      | 44633 |
| other  | TR_D_gene                          | 4      | 44633 |
| other  | IG_D_pseudogene                    | 3      | 44633 |
| other  | IG_pseudogene                      | 2      | 44633 |
| other  | IG_C_pseudogene                    | 1      | 44633 |



### 6. Example for an Enriched 3'-UTR Element

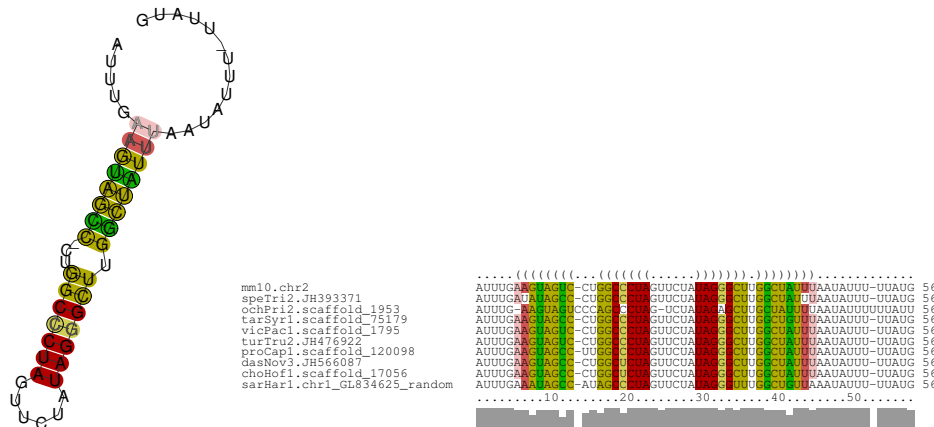

**Figure S7.** Consensus structure and alignment of a locus from chromosome 2. Structurally similar hits found by a Cpvariance Model (CM) made from this locus are enriched in 3'-UTRs.

**Table S4.** Genes with hits derived from the locus shown in Figure S6. The two most significant hits map to 3'UTR's of genes.

| Gene ID            | Chr. | Coordinates         | Gene Description                                              | E-value              |
|--------------------|------|---------------------|---------------------------------------------------------------|----------------------|
| ENSMUSG00000027598 | 2    | 155226397-155226452 | <b>3'UTR, Source of CM.</b> E3 ubiquitin-protein ligase Itchy | $10^{-10}$           |
| ENSMUSG00000067285 | 5    | 42216341-42216396   | <b>3'UTR.</b> predicted gene 16223                            | $10^{-7}$            |
| ENSMUSG00000004530 | 5    | 113900052-113900107 | <b>Intron.</b> Coronin-1C                                     | $6.3 \times 10^{-3}$ |

## 7. Distribution of repeats over biotypes

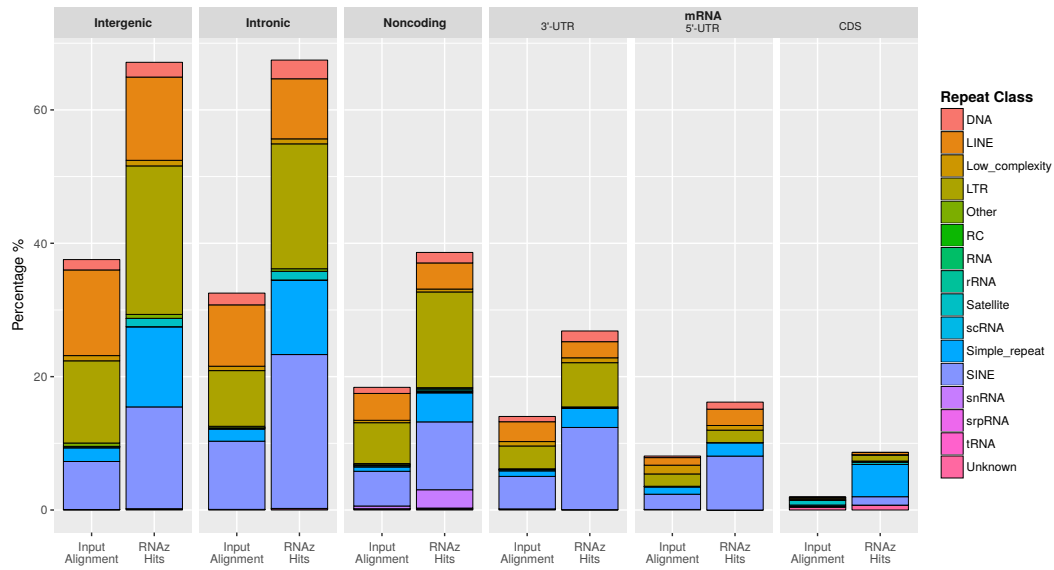

**Figure S8.** Distribution of repeats over the genome and RNAz high confidence hits.

## 8. References

1. Seemann, S.E.; Mirza, A.H.; Hansen, C.; Bang-Berthelsen, C.H.; Garde, C.; Christensen-Dalsgaard, M.; Torarinsson, E.; Yao, Z.; Workman, C.T.; Pociot, F.; et al. The identification and functional annotation of RNA structures conserved in vertebrates. *Genome Res.* **2017**, *27*, 1371–1383.
2. Tetuev, R.; Nazipova, N.N. Consensus of repeated region of mouse chromosome 6 containing 60 tandem copies of a complex pattern. *Repbases Rep.* **2010**, *10*, 776.
3. Jurka, J. Long terminal repeats from Murinae. *Repbases Rep.* **2009**, *9*, 1462.
4. Gene/Transcript Biotypes in GENCODE & Ensembl. Available online: [https://www.genencodegenes.org/genencode\\_biotypes.html](https://www.genencodegenes.org/genencode_biotypes.html) (accessed on 30 July 2018).
