# Supplementary material for: RNA Structure Elements Conserved between Mouse and 59 Other Vertebrates
Source: MDPI journal article supplement (doi:10.3390/genes9080392), 2018-08-01
Supplement: s2 [file s2]

G C A T  
T A C G  
G C A T

*genes*
