# Supplementary figures and images for: RNA Structure Elements Conserved between Mouse and 59 Other Vertebrates
Source: MDPI journal article supplement (doi:10.3390/genes9080392), 2018-08-01

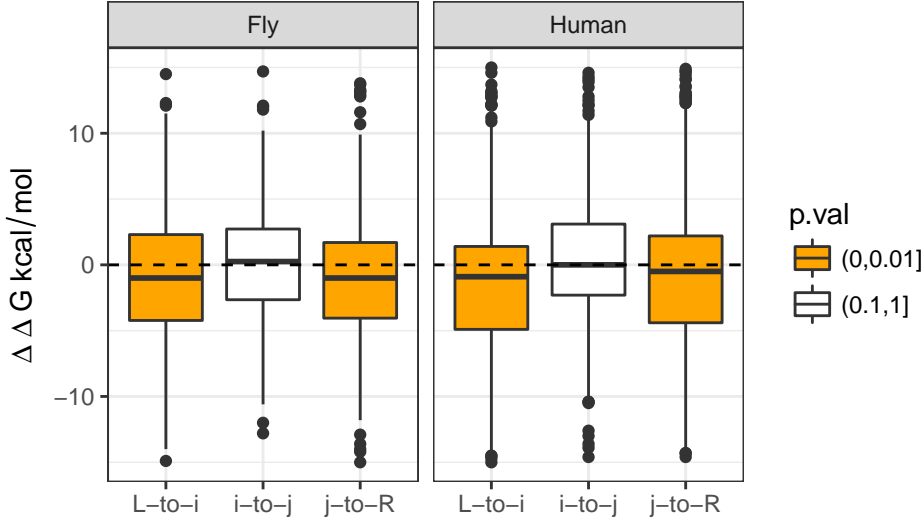

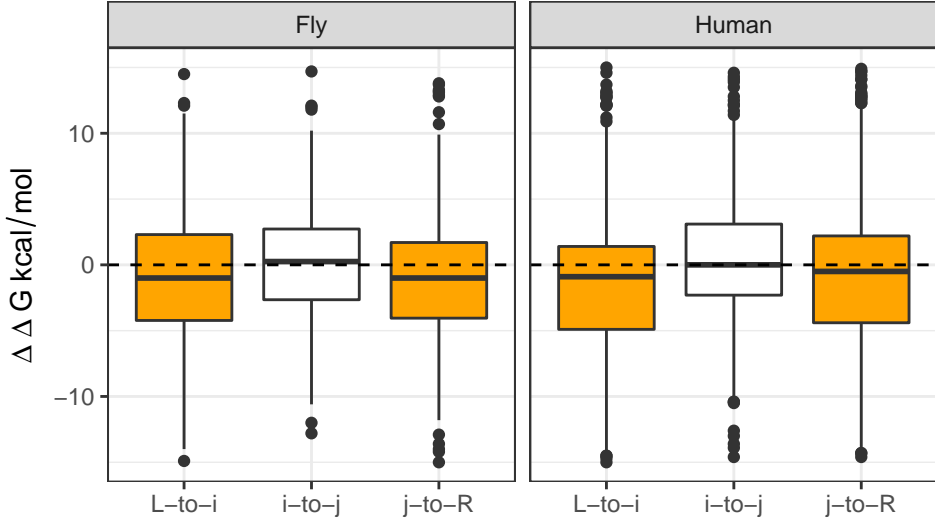

Supplement: s2 [file s2]

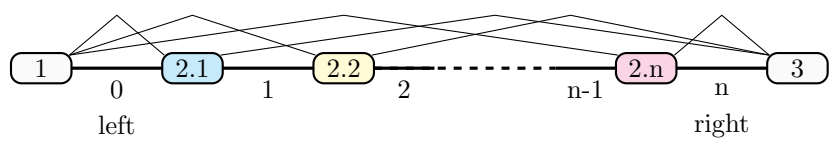

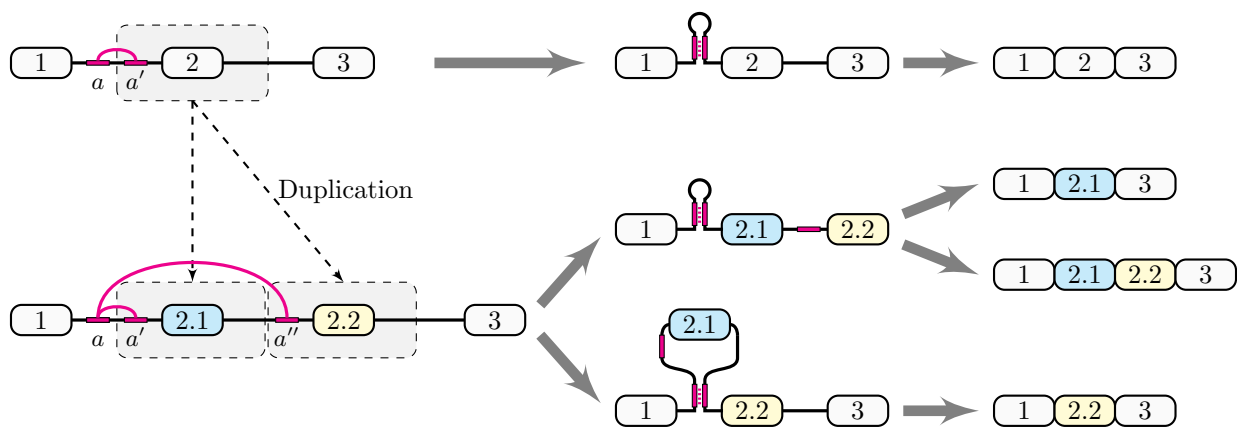

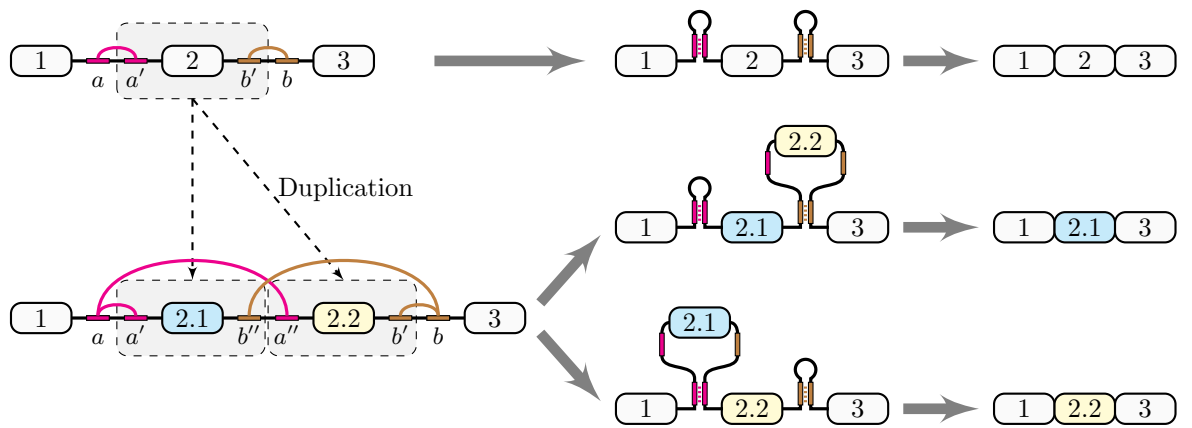

Supplement: s2 [file s2]

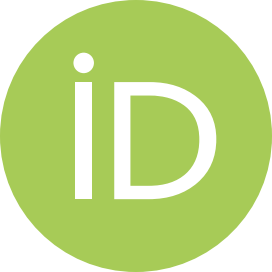

Supplement: s2 [file s2]

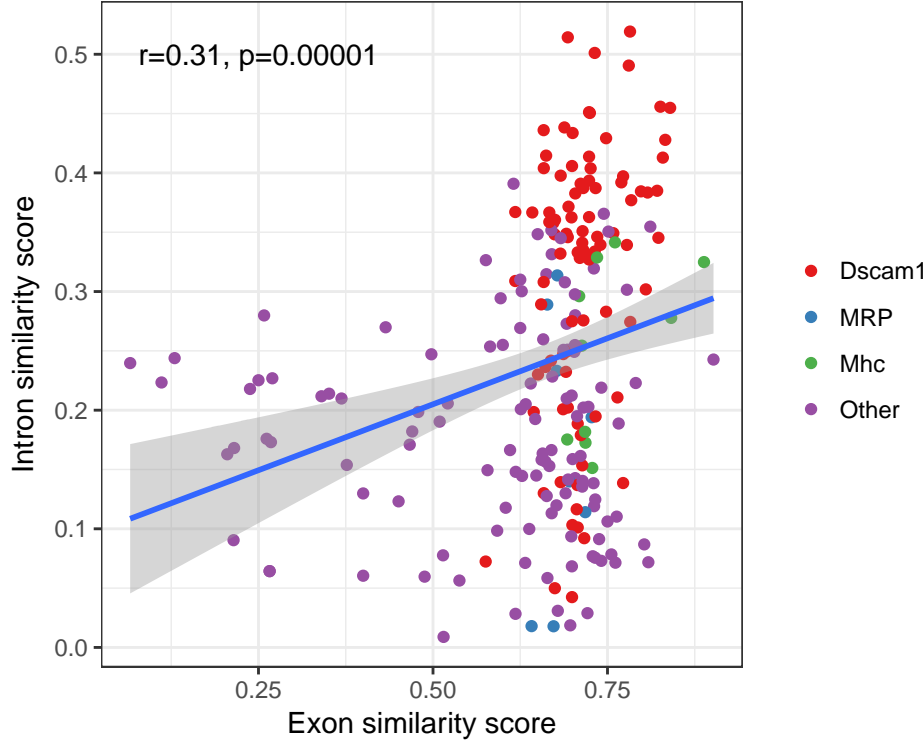

Supplement: s2 [file s2]

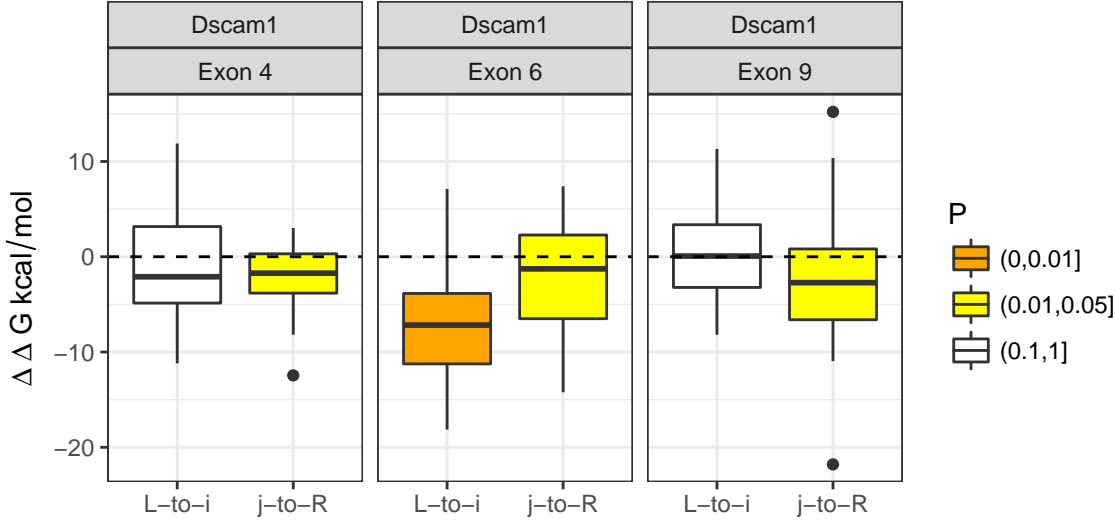

Supplement: s2 [file s2]

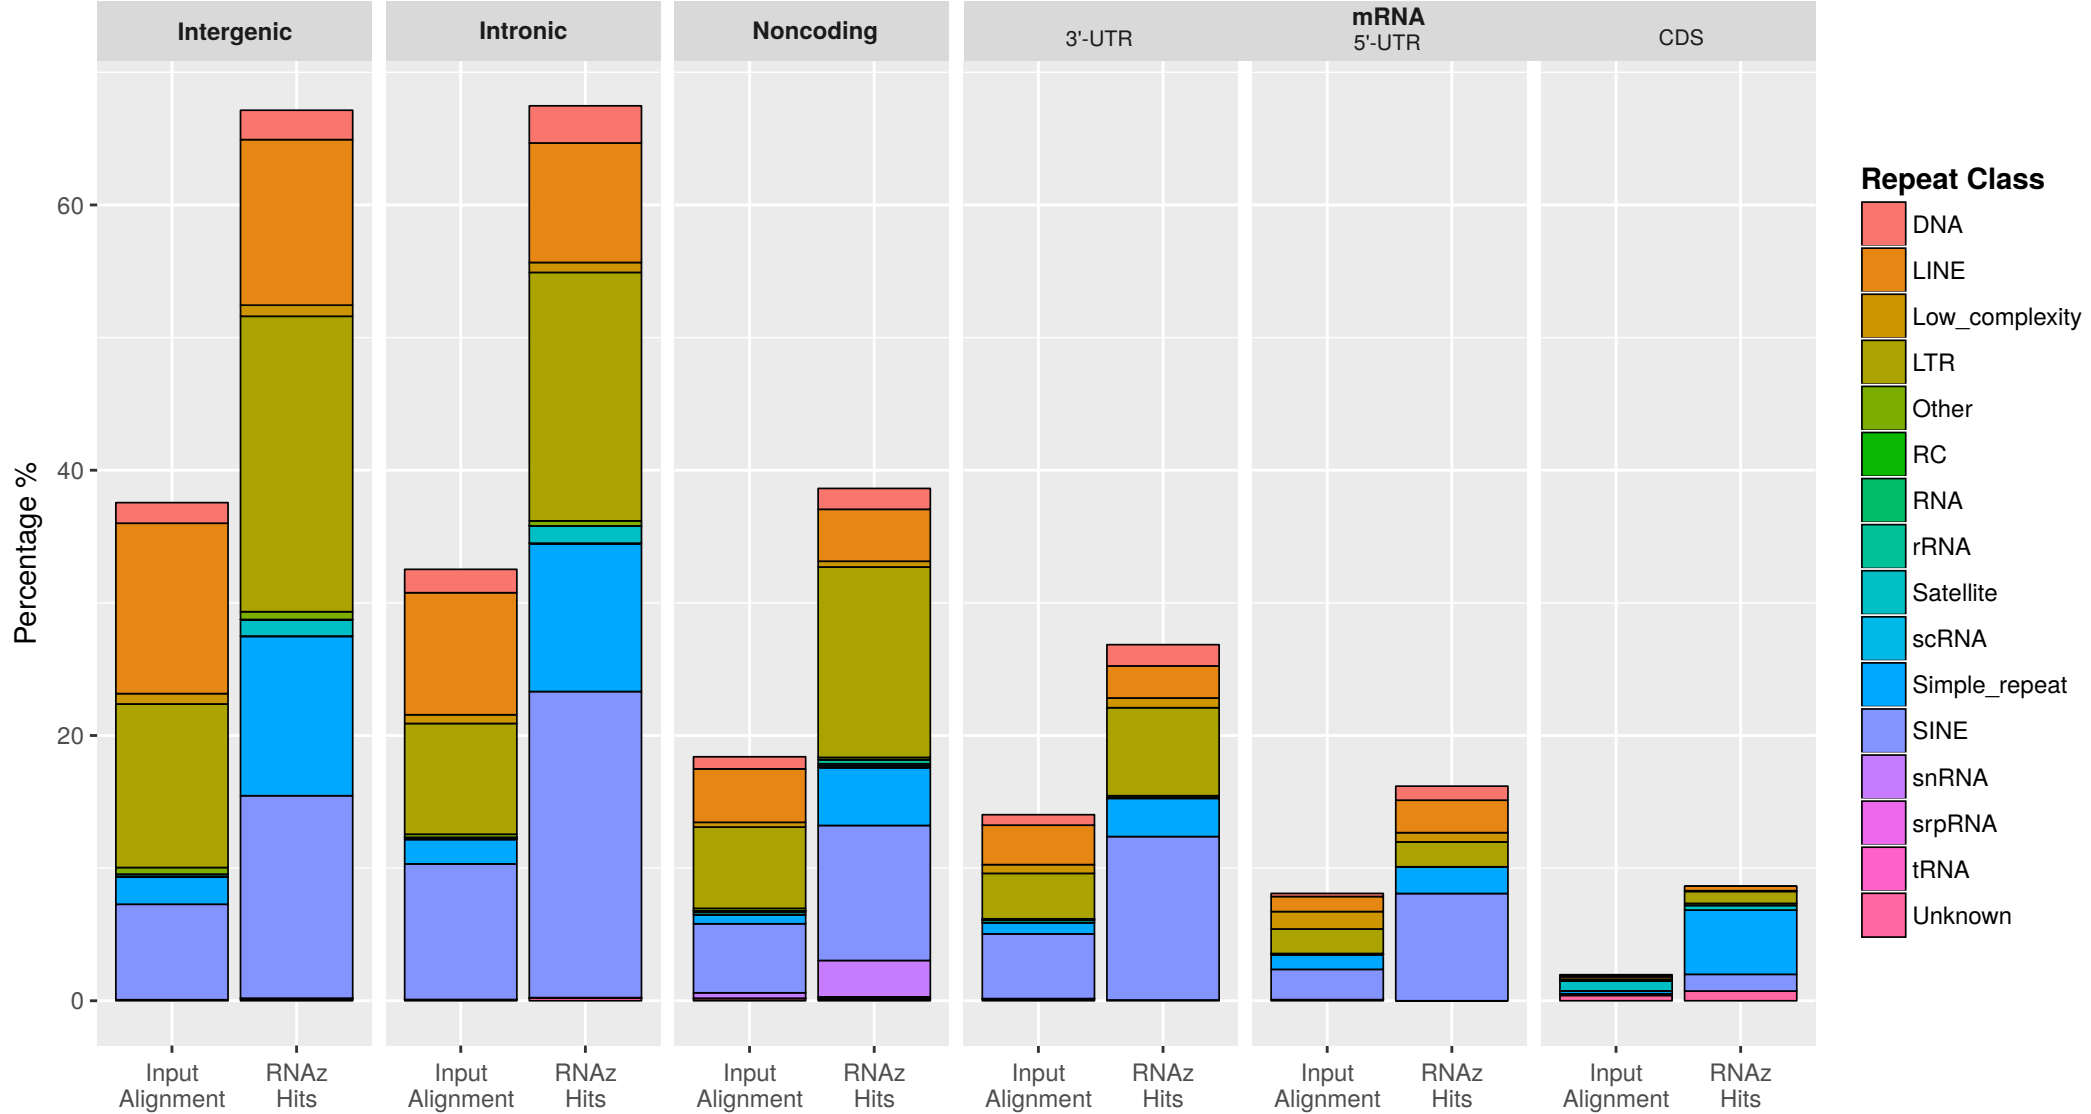

Supplement: s2 [file s2]

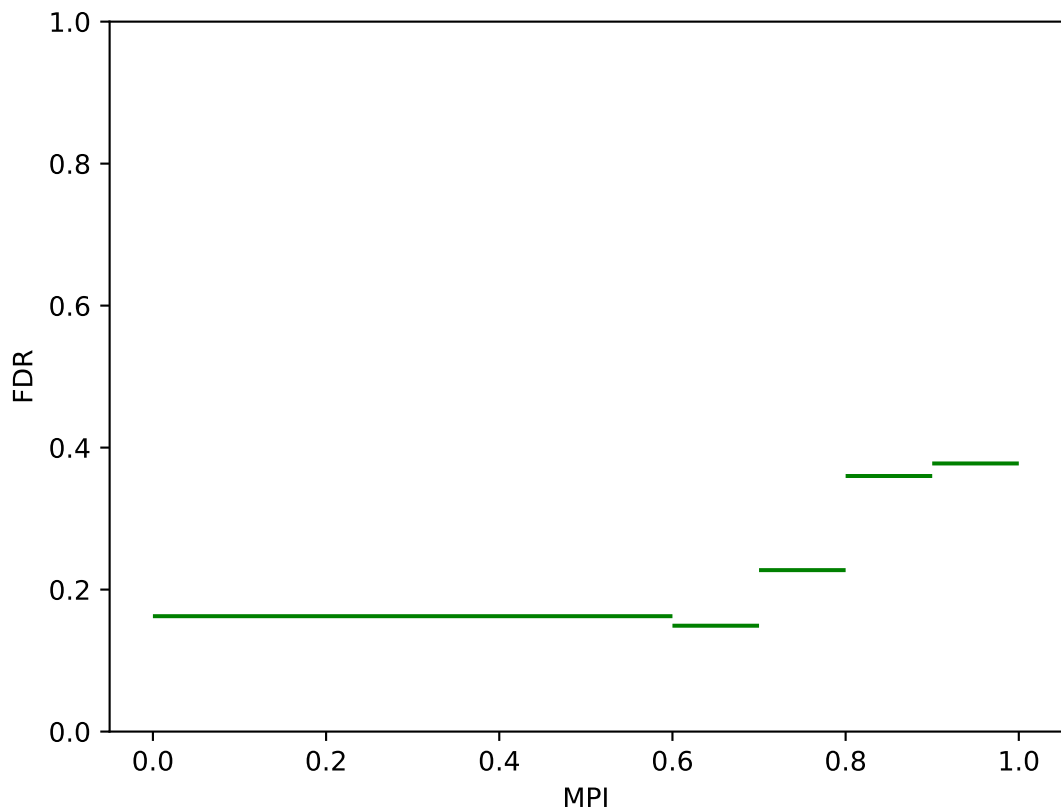

Supplement: s2 [file s2]

## 2 species in alignment

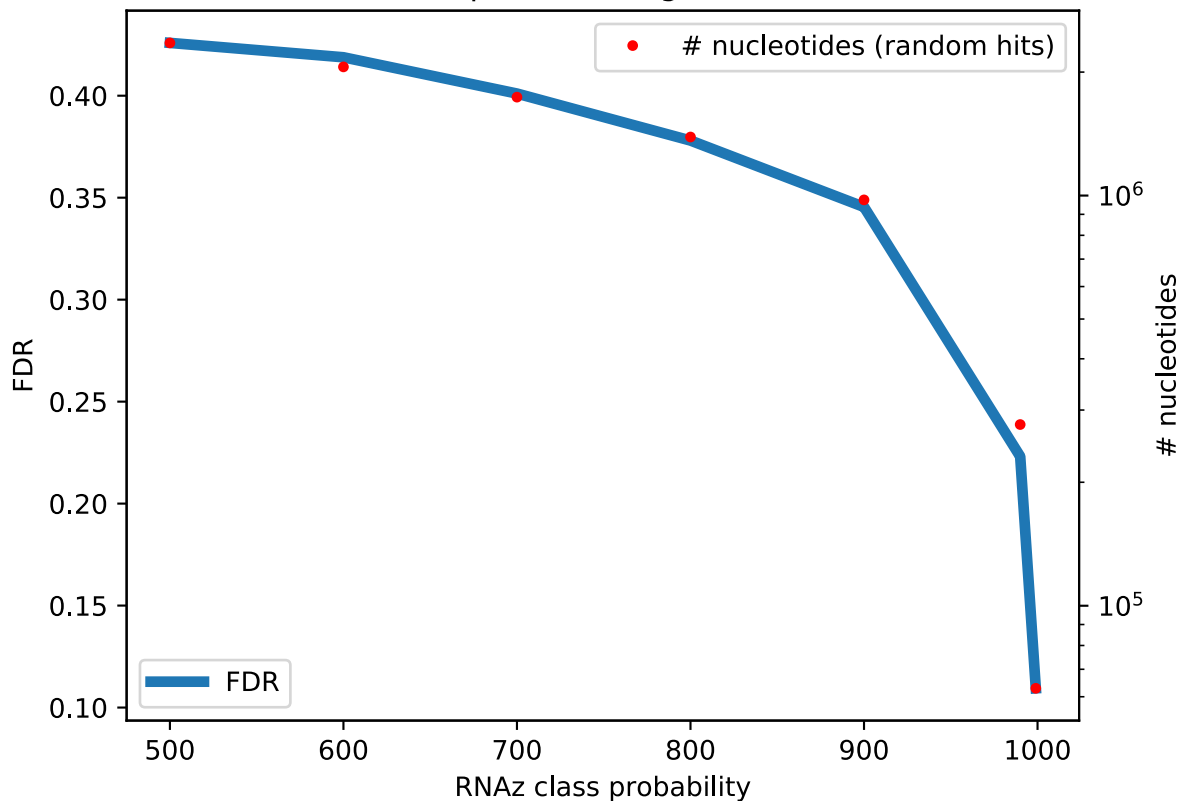

Supplement: s2 [file s2]

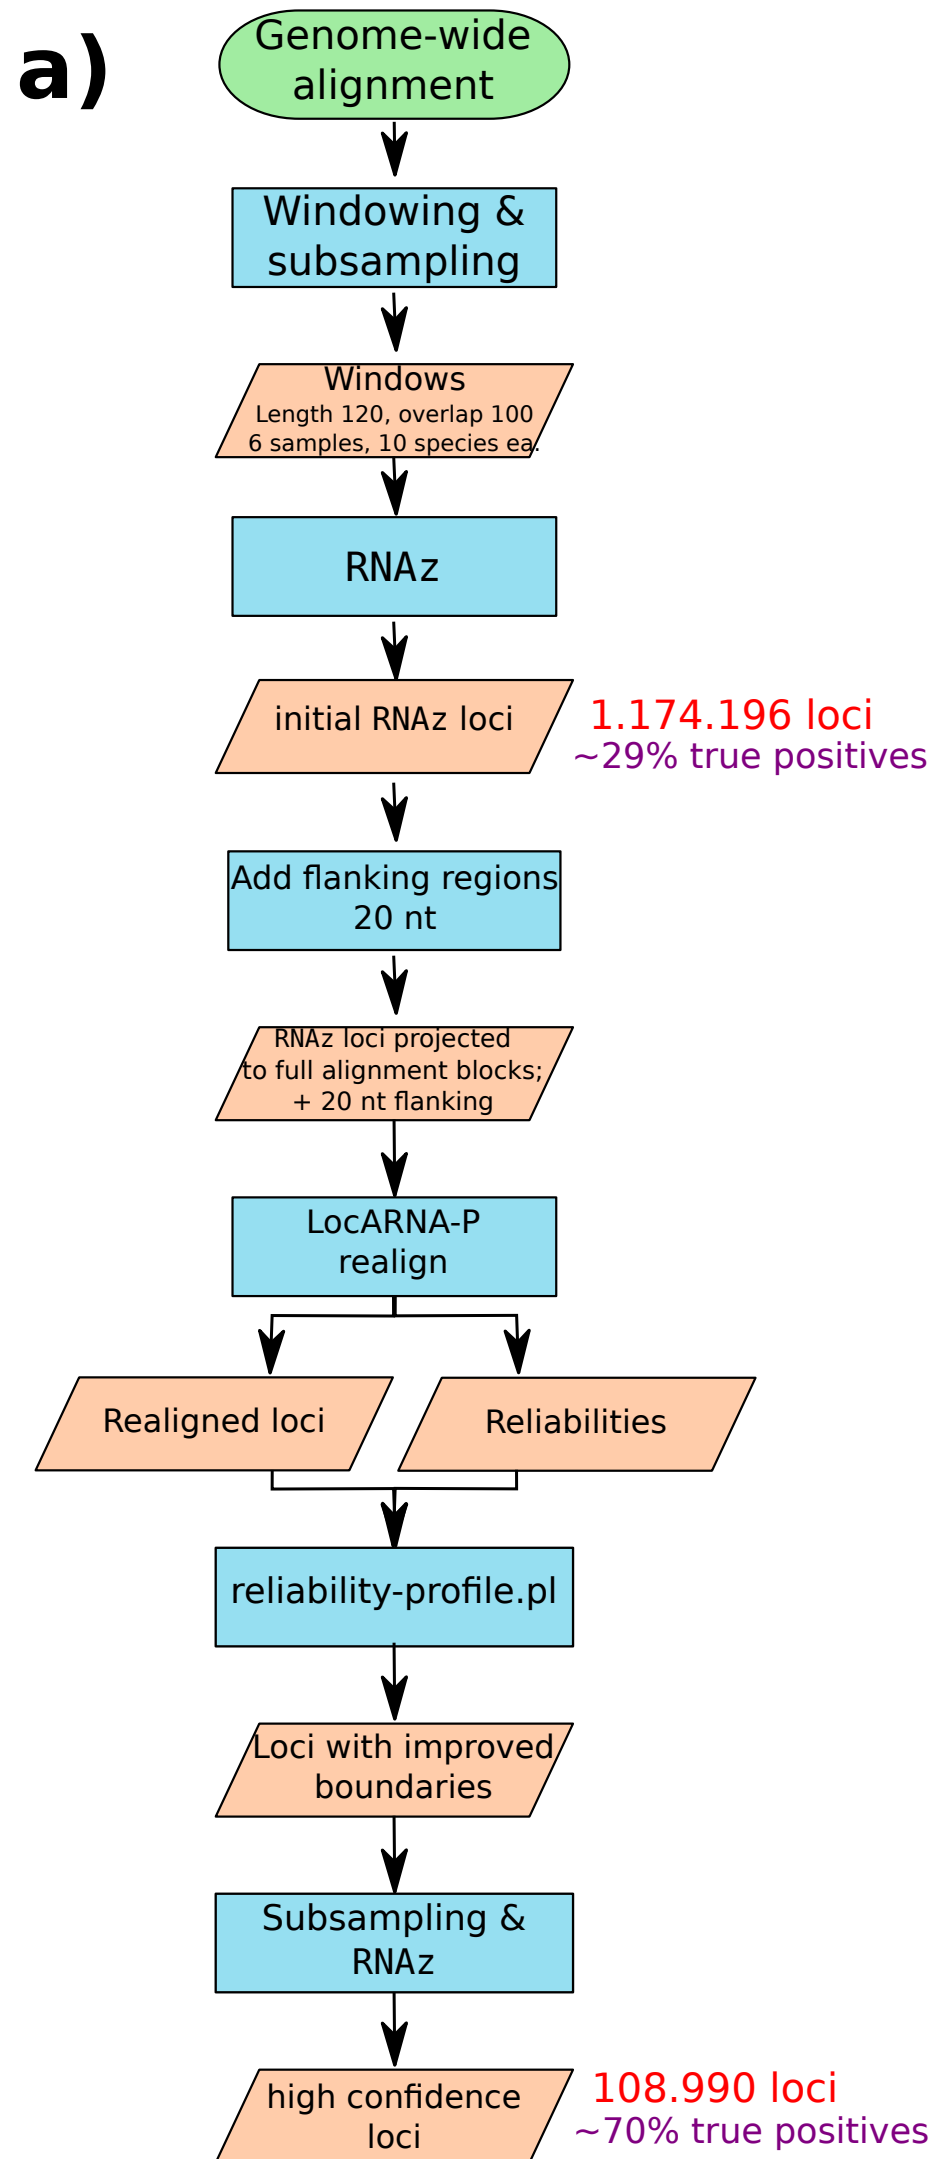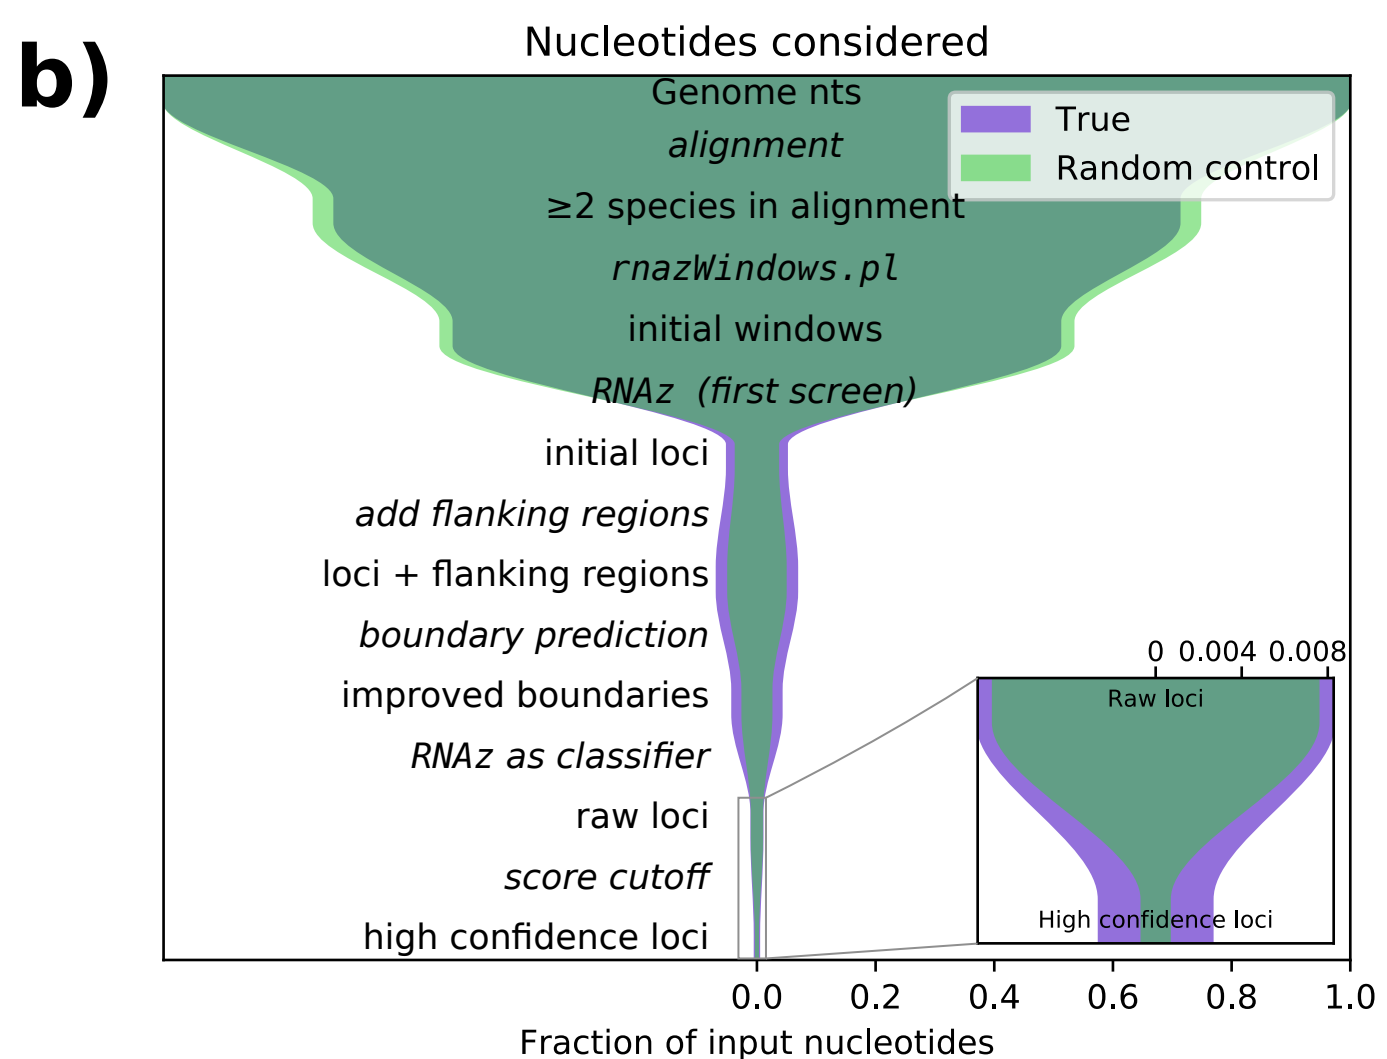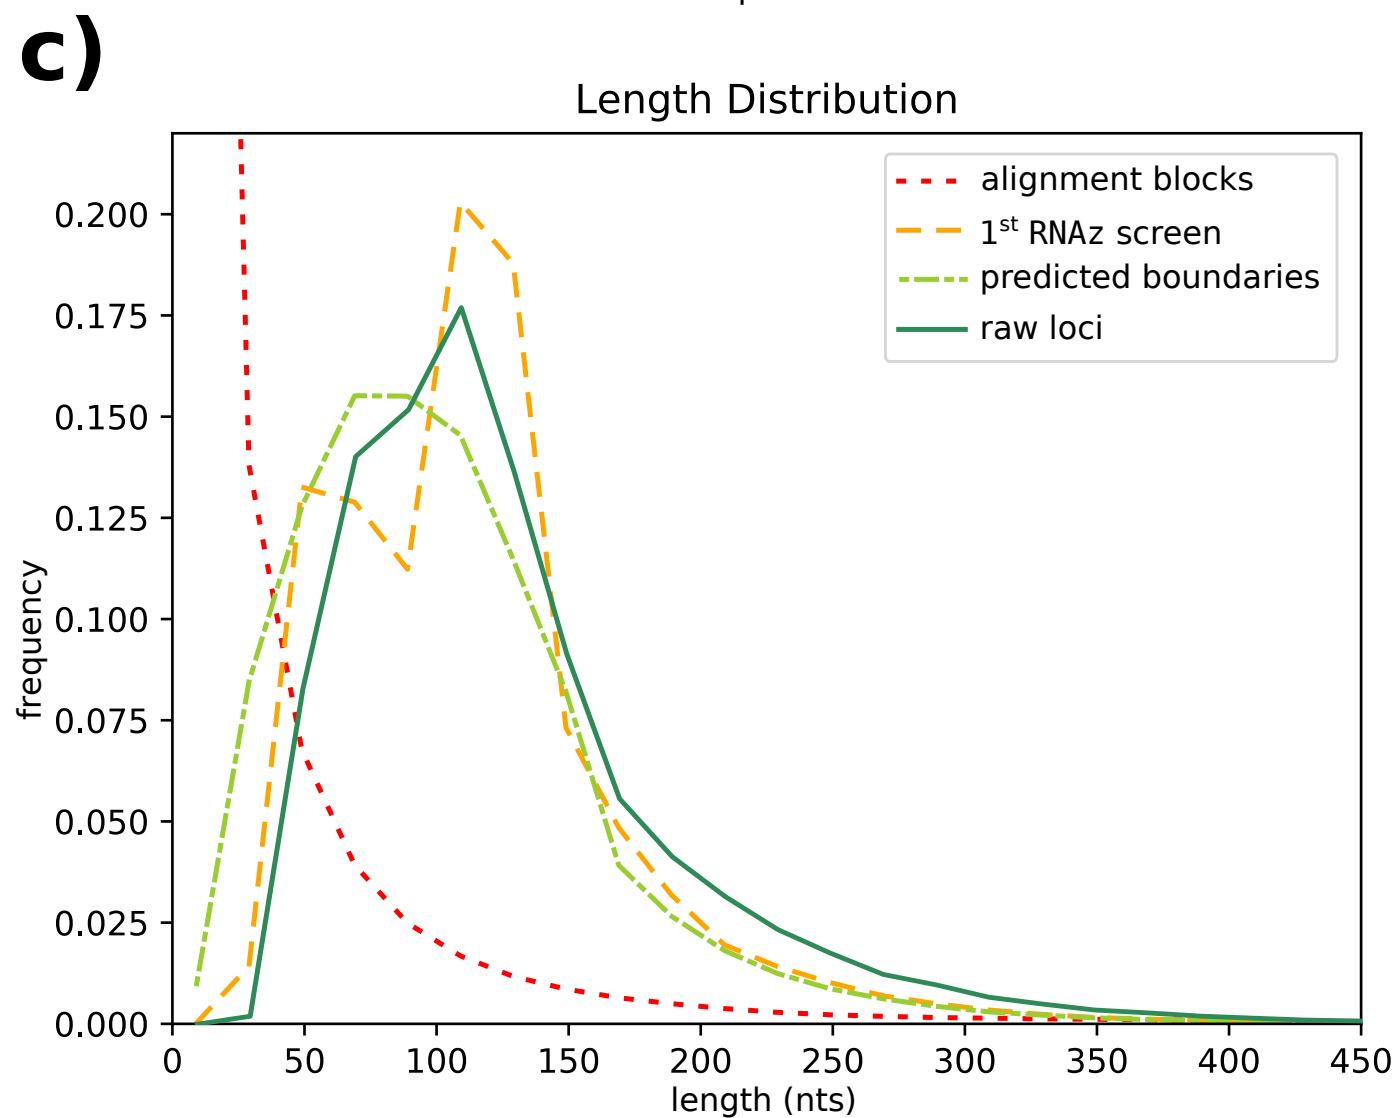

Supplement: s2 [file s2]

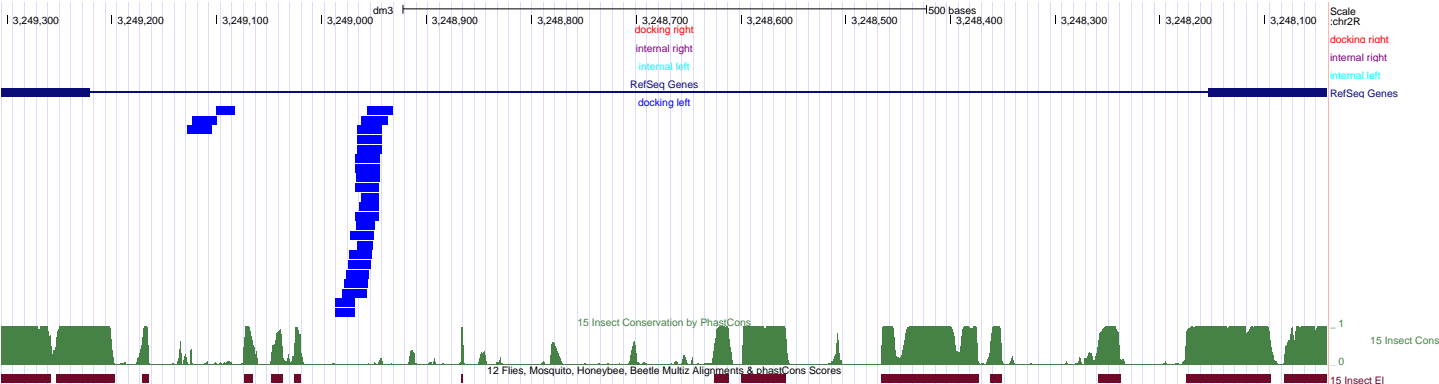

Supplement: s2 [file s2]

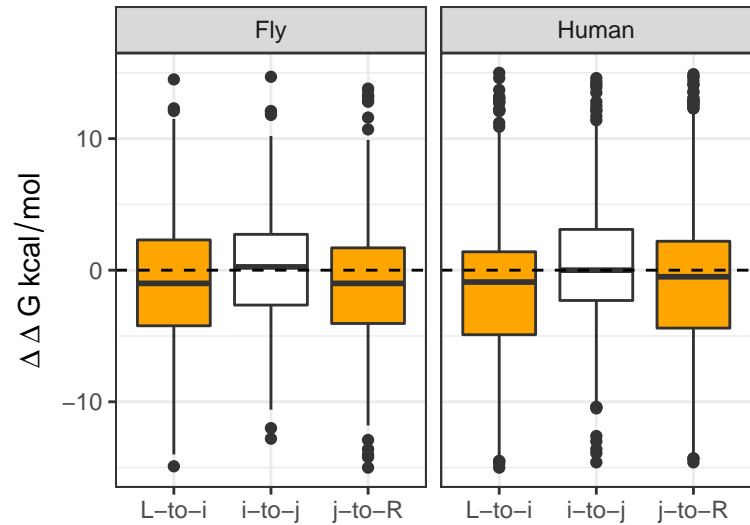

p.val

(0,0.01]

(0.1,1]

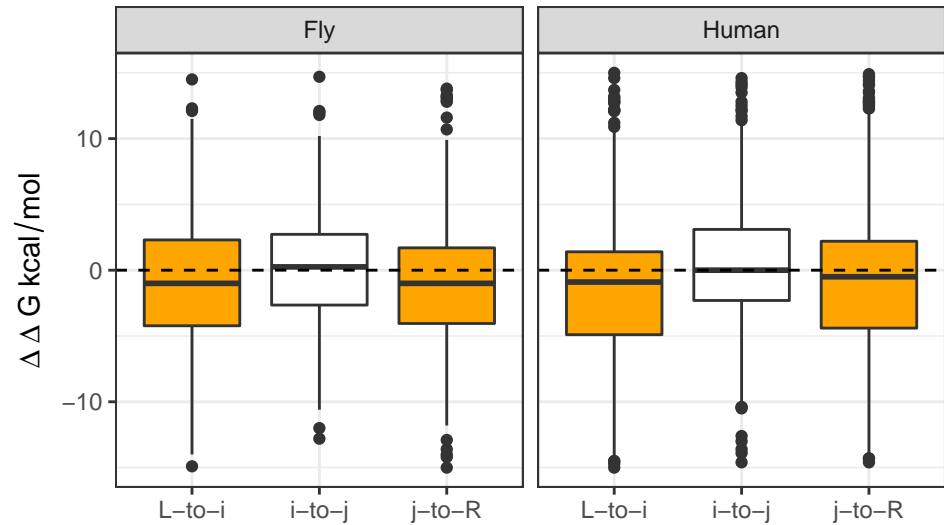

Supplement: s2 [file s2]

$\Delta$  Intron similarity

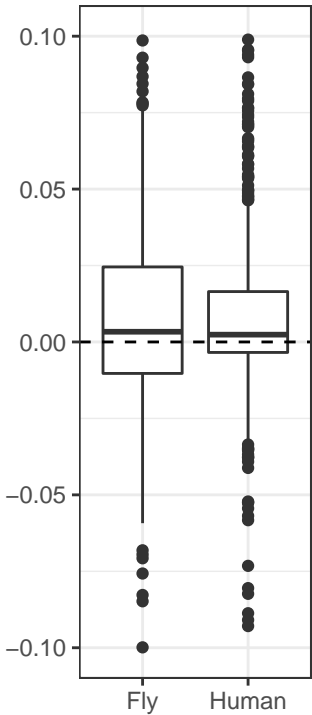

Supplement: s2 [file s2]

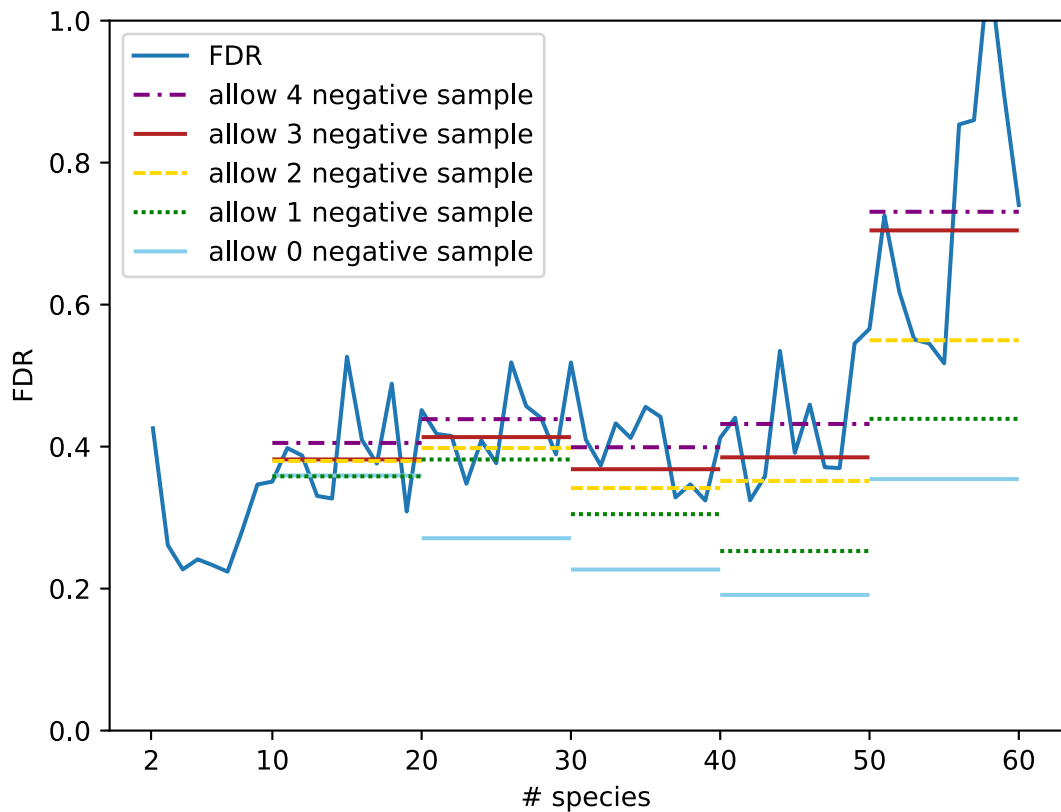

Supplement: s2 [file s2]

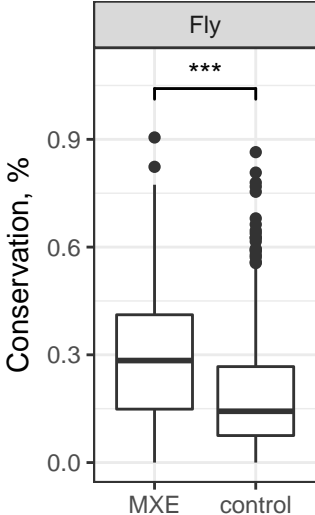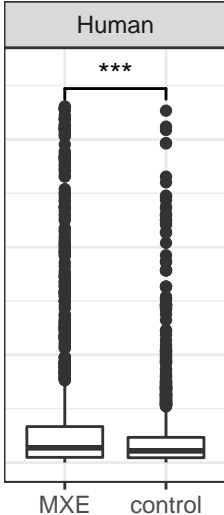

Supplement: s2 [file s2]

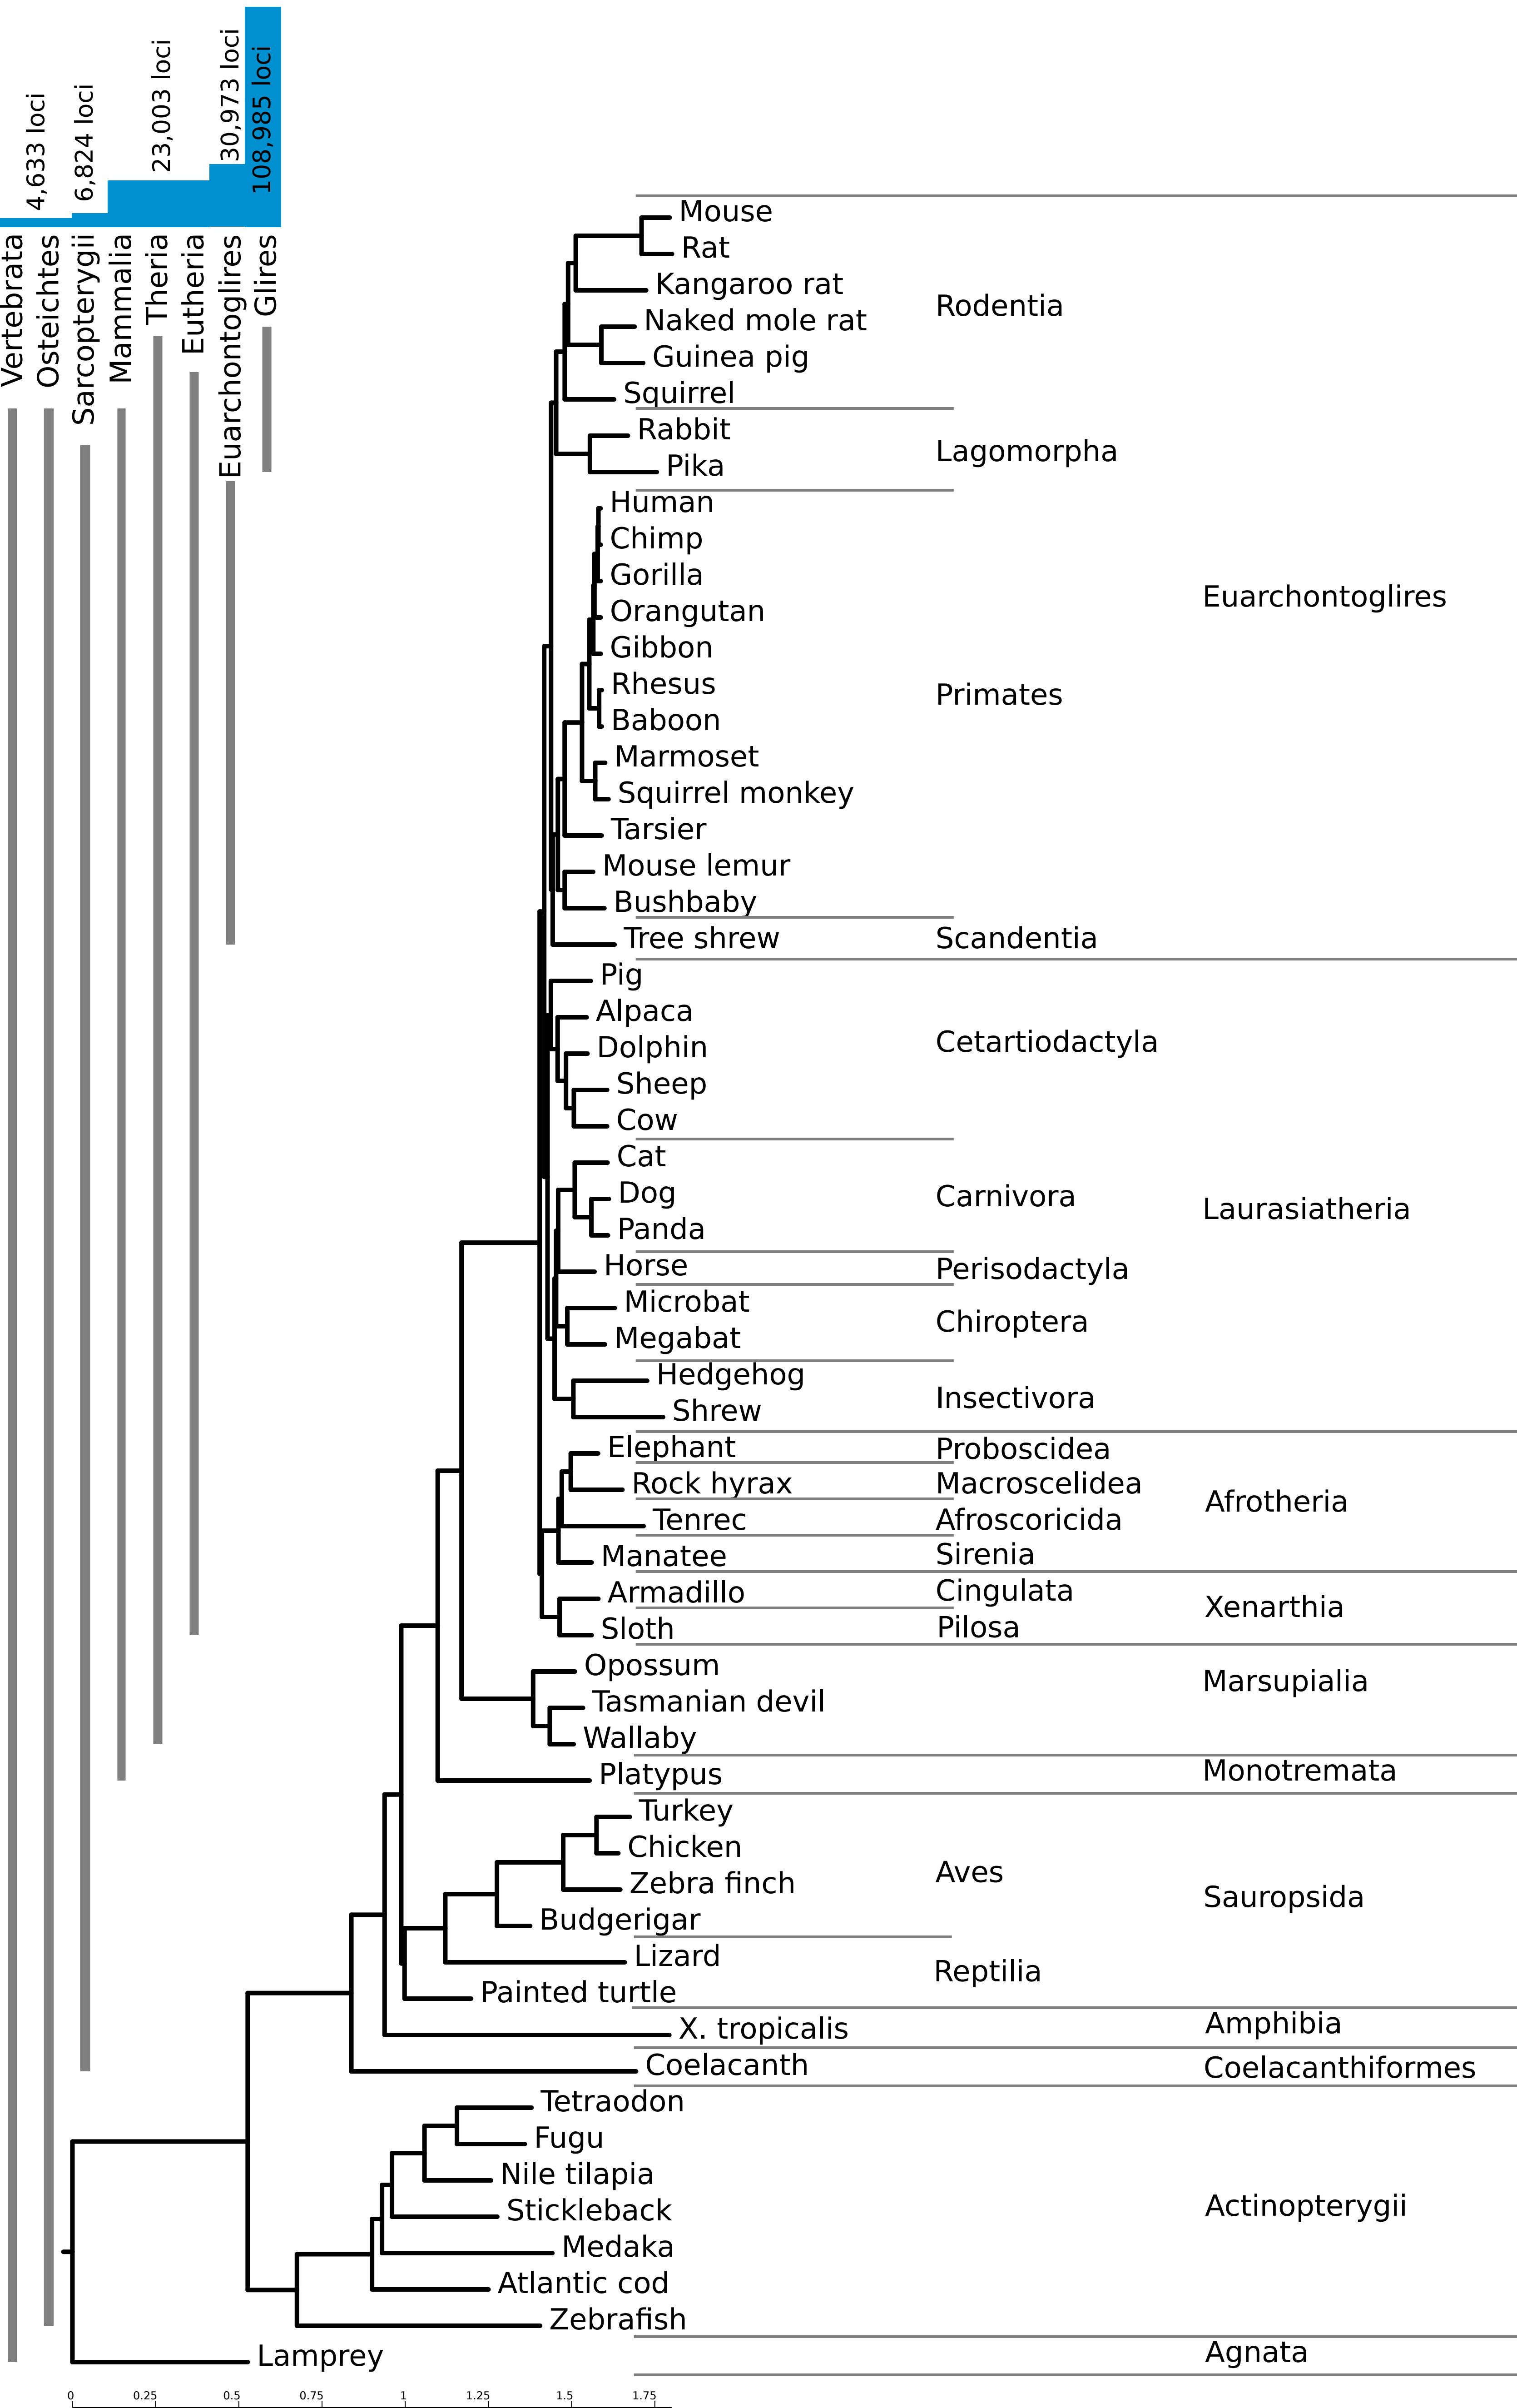

Supplement: s2 [file s2]

$\Delta$  Intron similarity

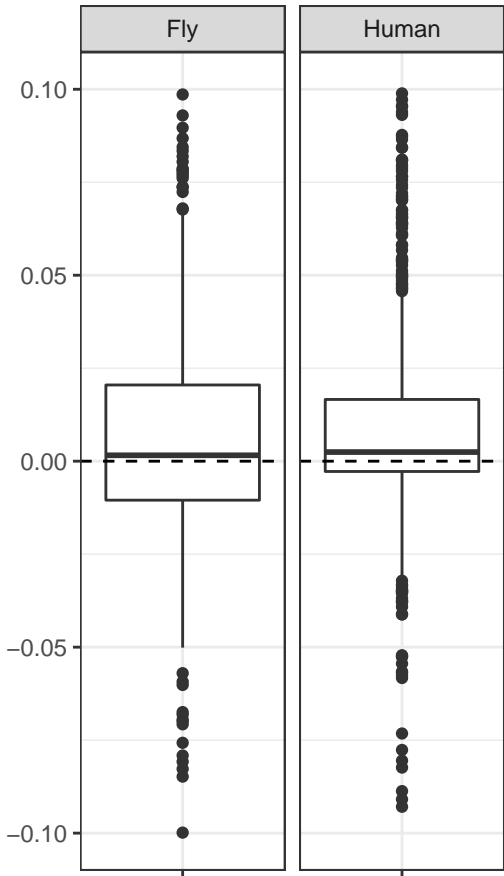

Supplement: s2 [file s2]

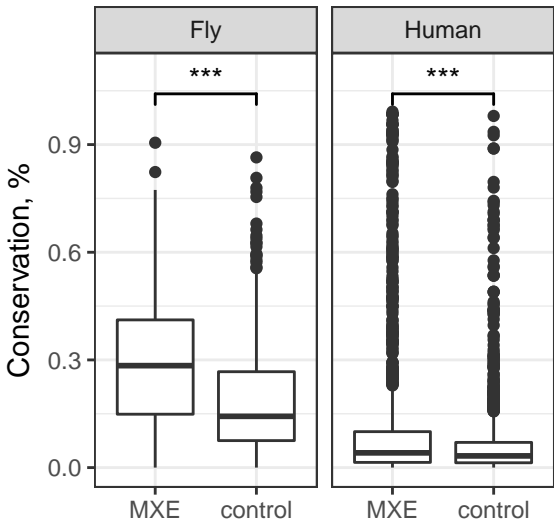

Supplement: s2 [file s2]

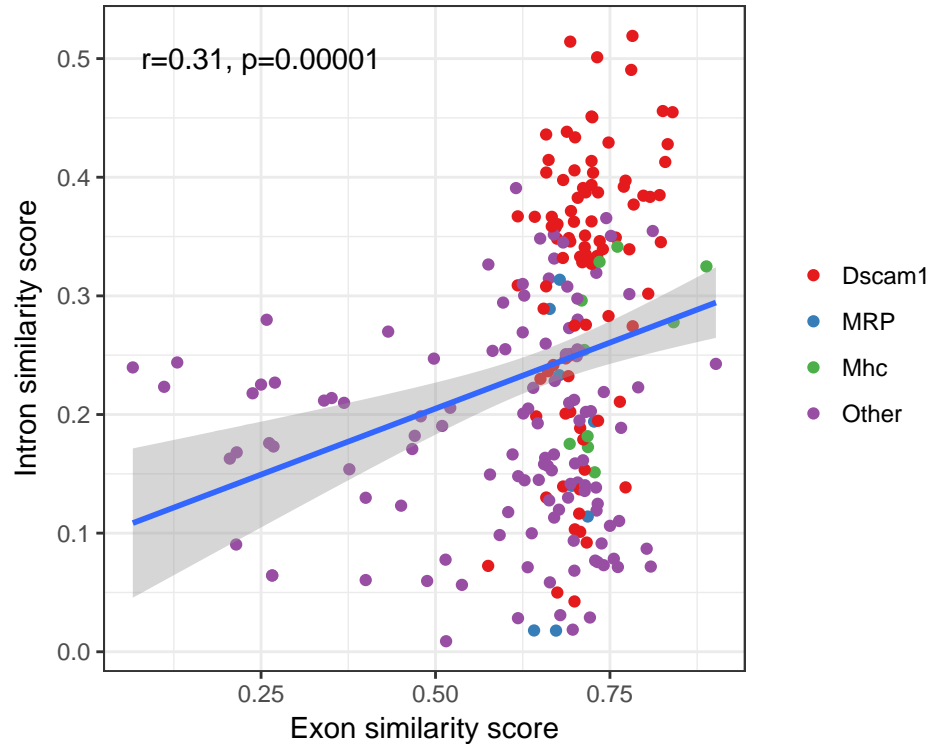

Supplement: s2 [file s2]



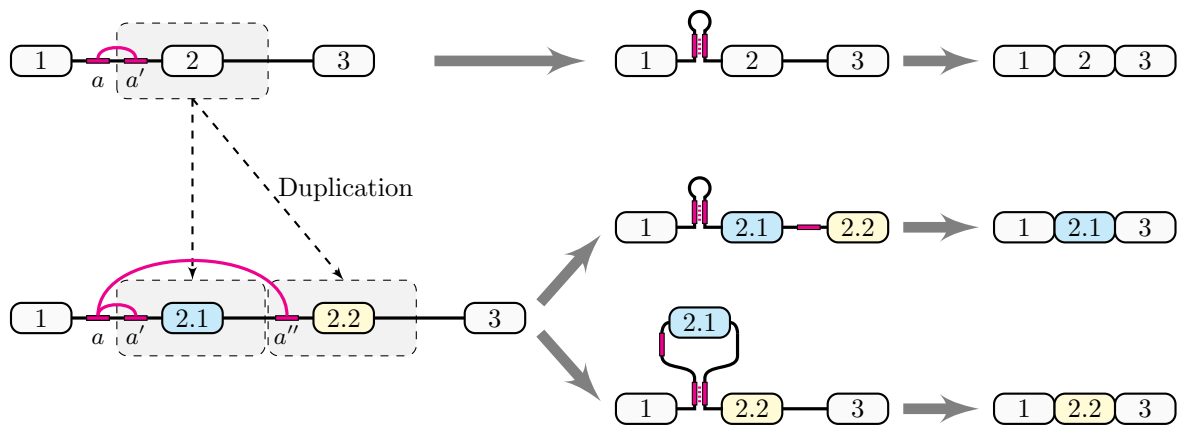



Supplement: s2 [file s2]

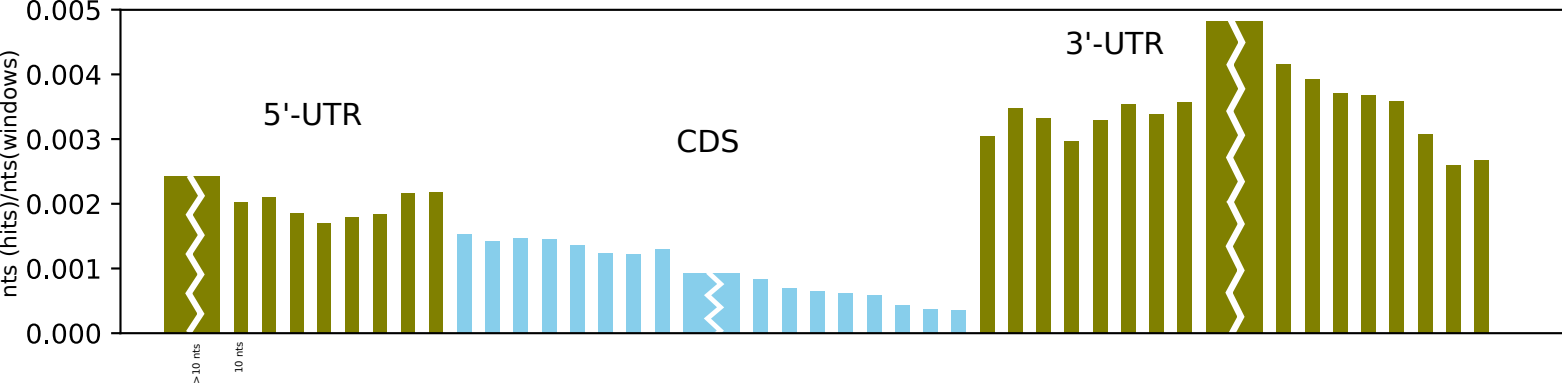

Supplement: s2 [file s2]

$\Delta$  Intron similarity

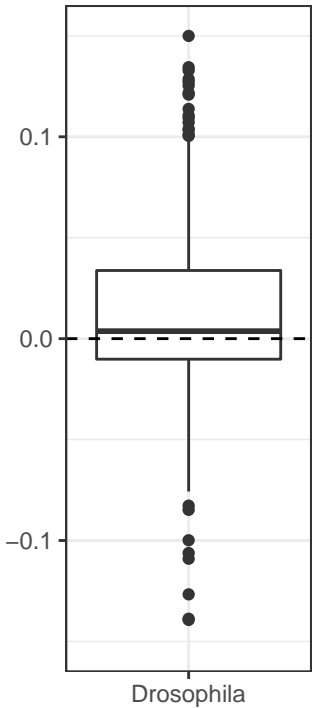

Supplement: s2 [file s2]

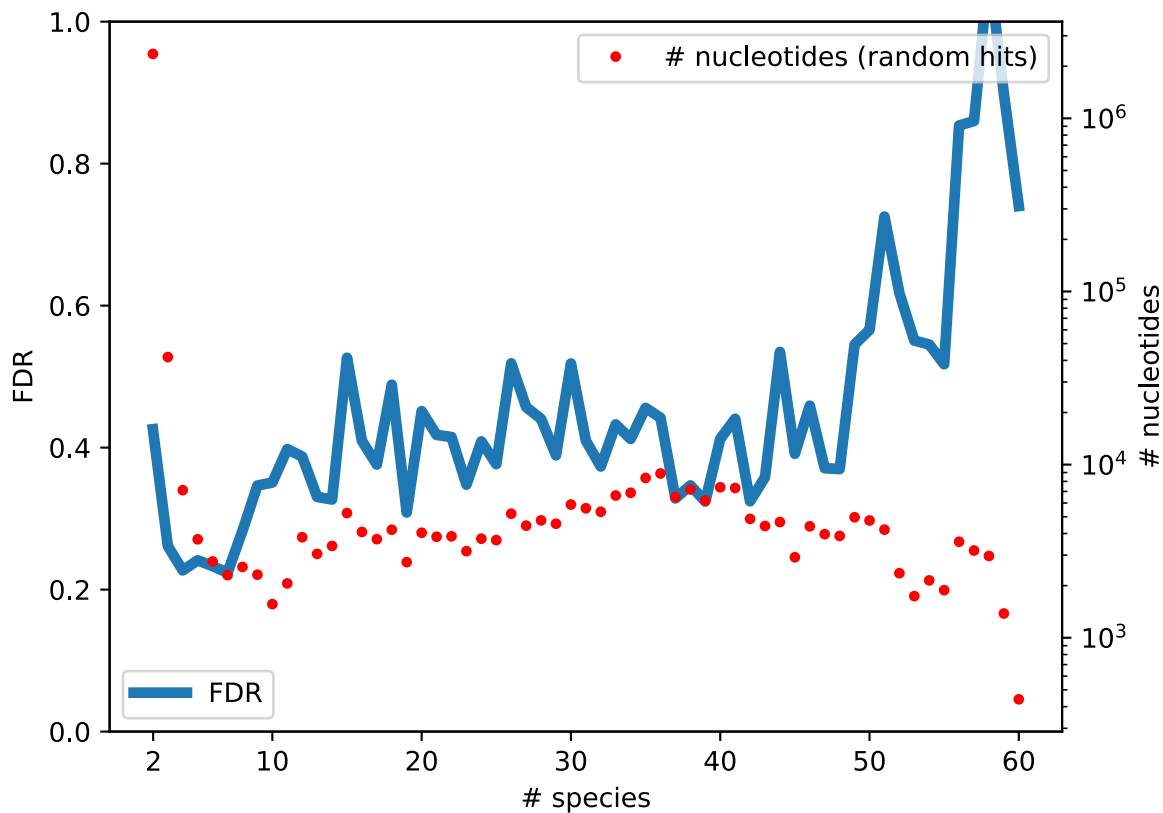

Supplement: s2 [file s2]

$\Delta$  Intron similarity

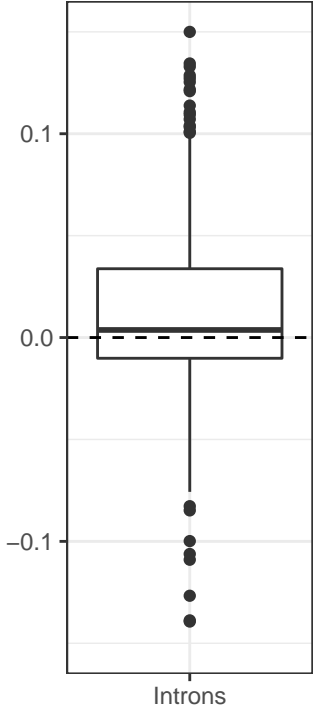

Introns

Supplement: s2 [file s2]

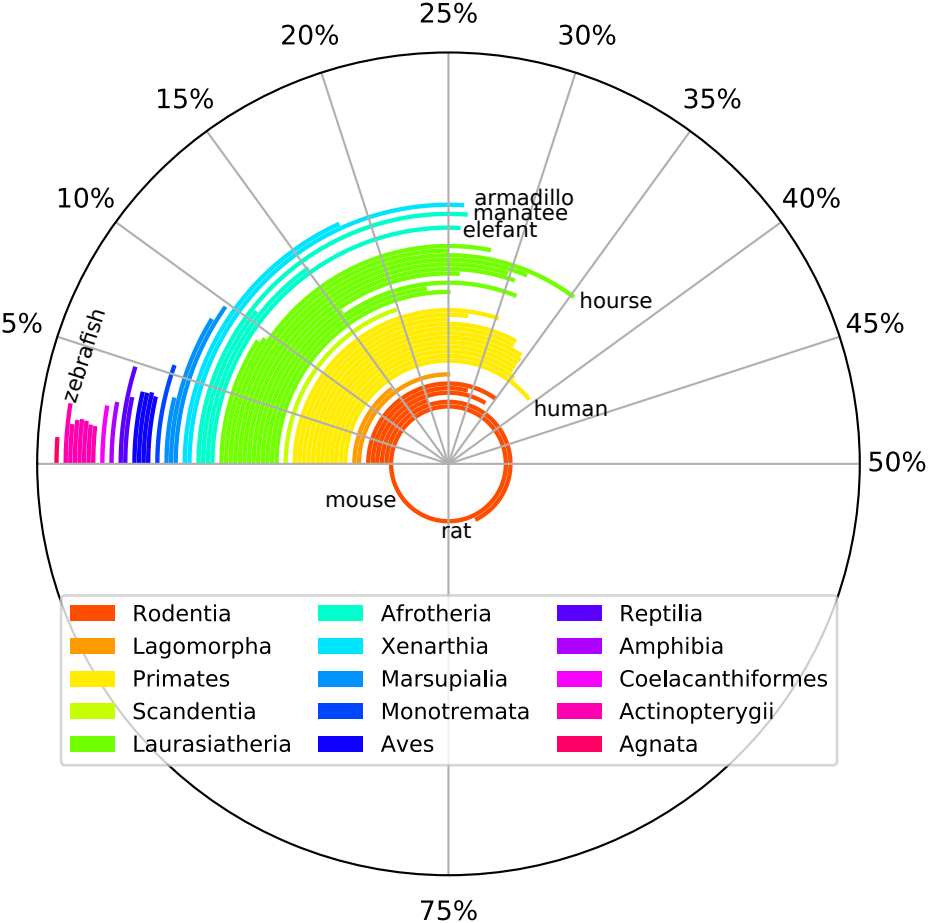

Supplement: s2 [file s2]

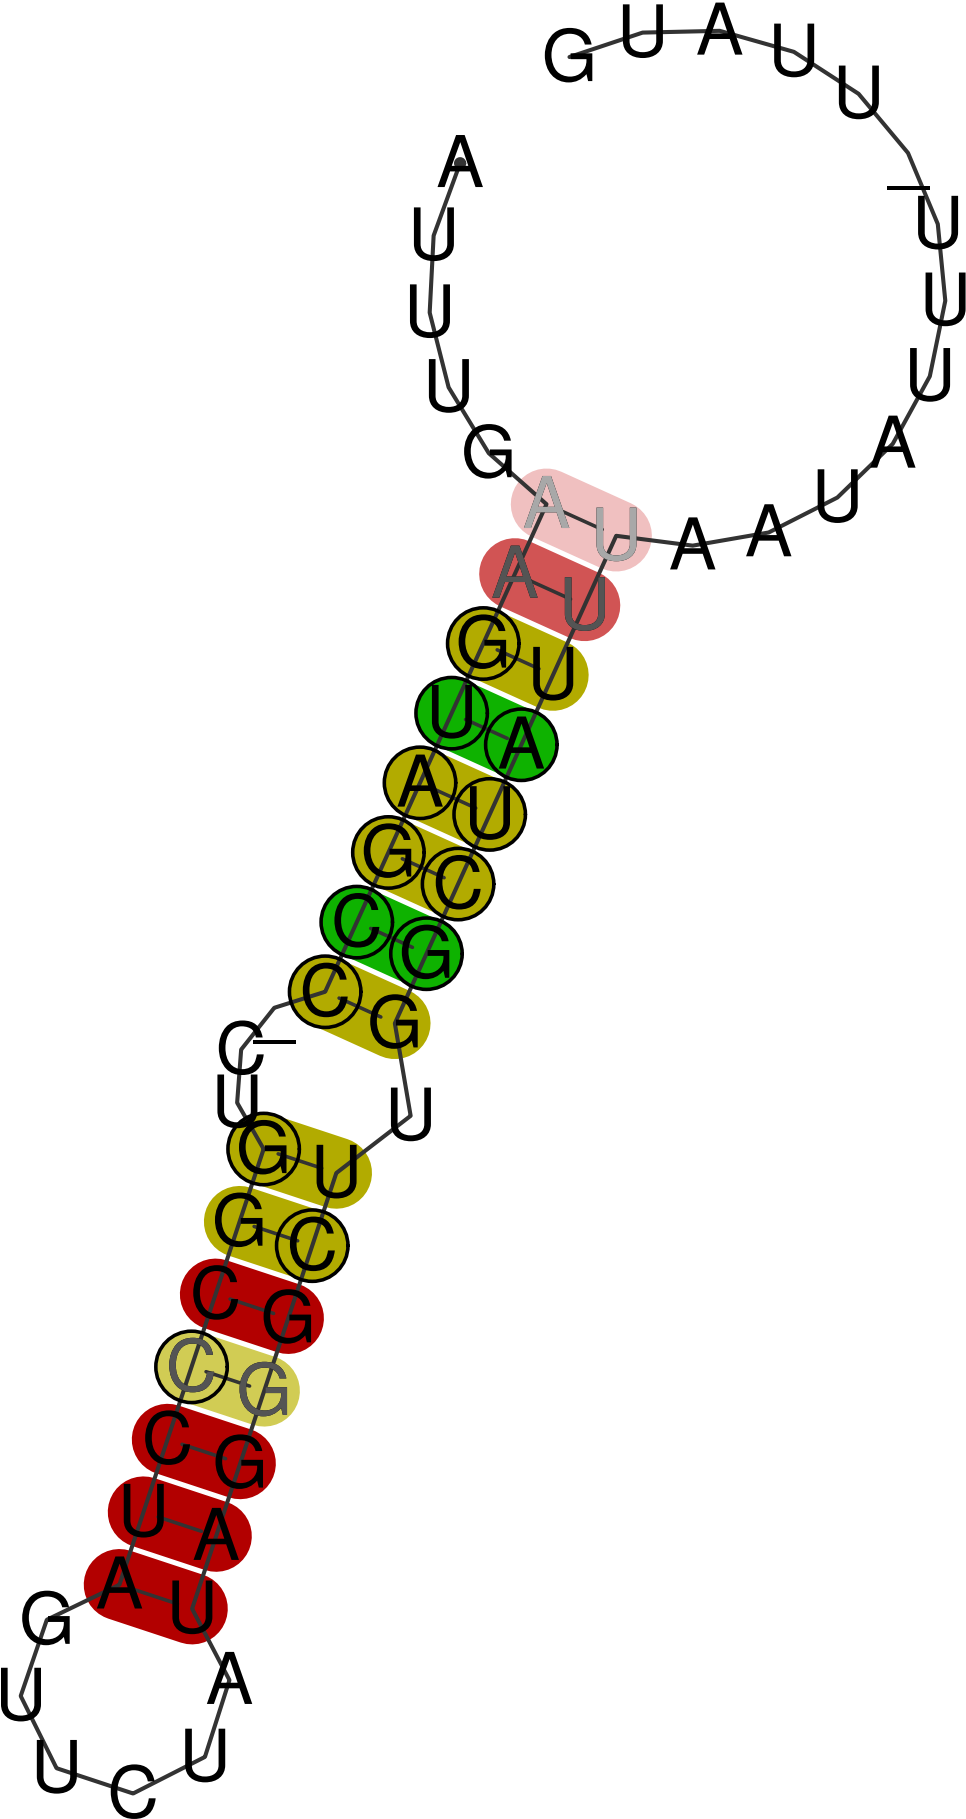

Supplement: s2 [file s2]

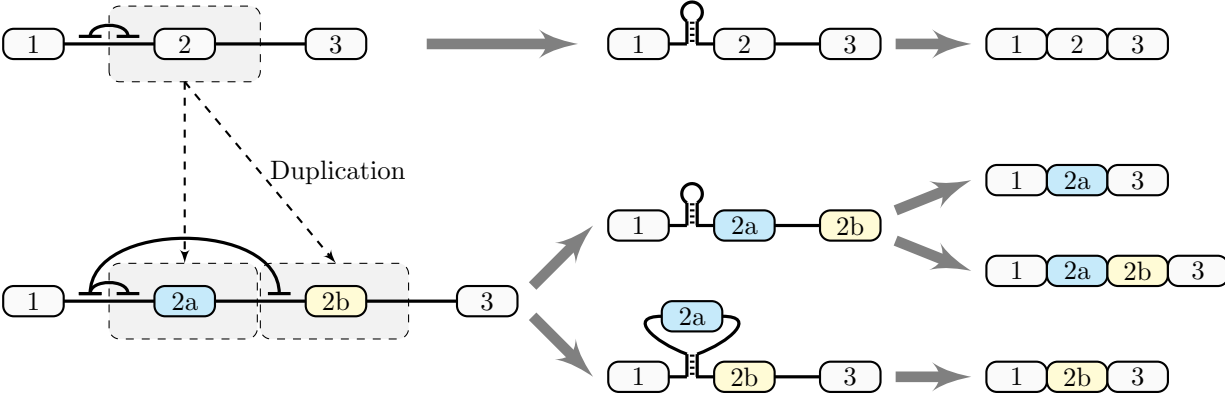

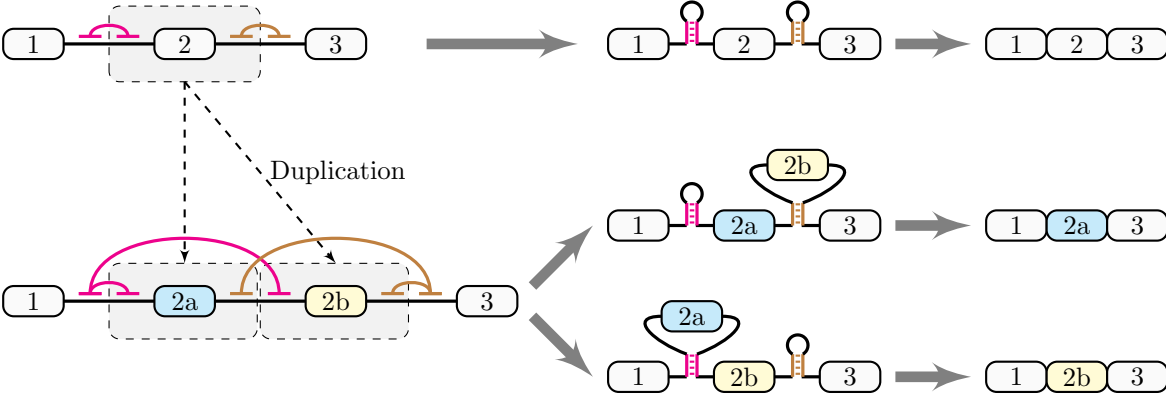

Supplement: s2 [file s2]

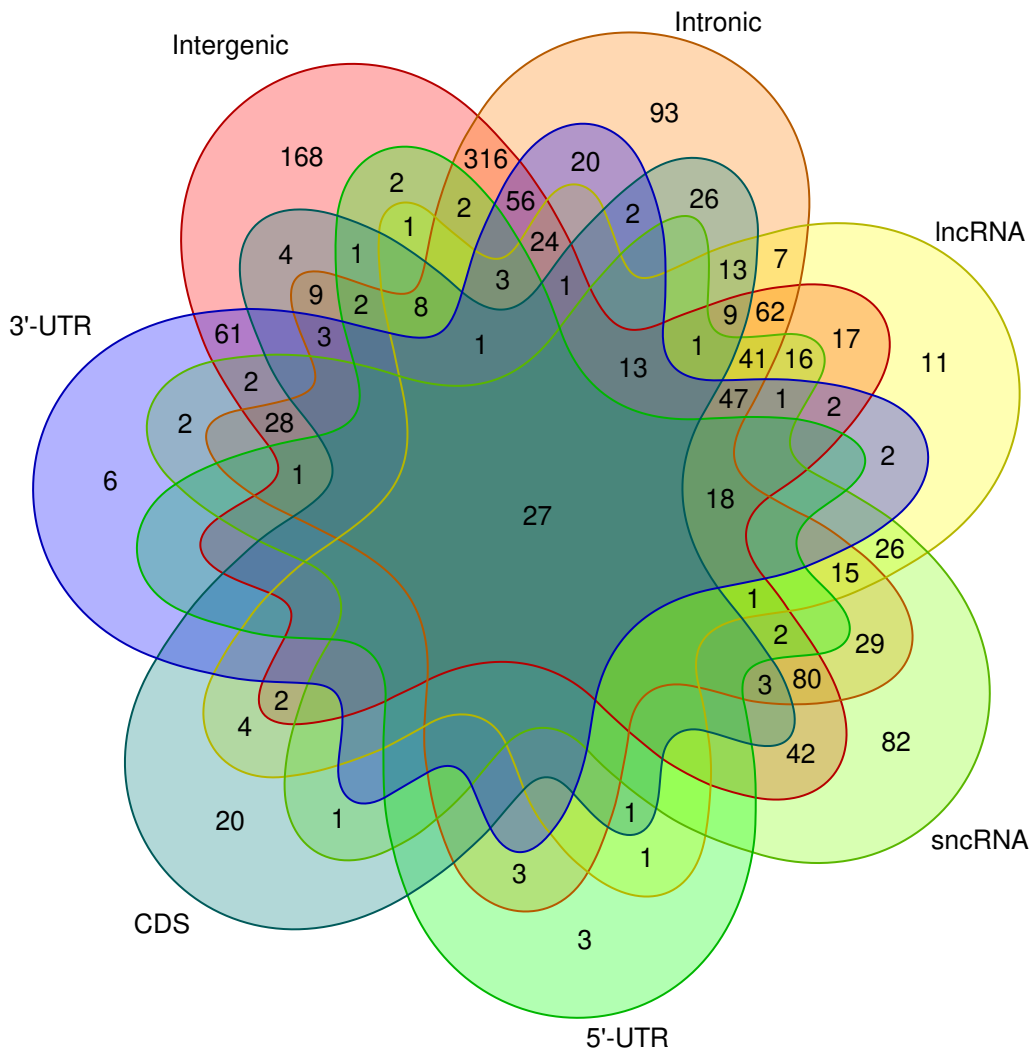

Supplement: s2 [file s2]

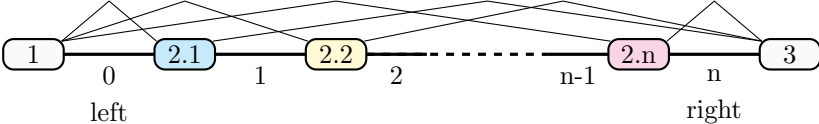

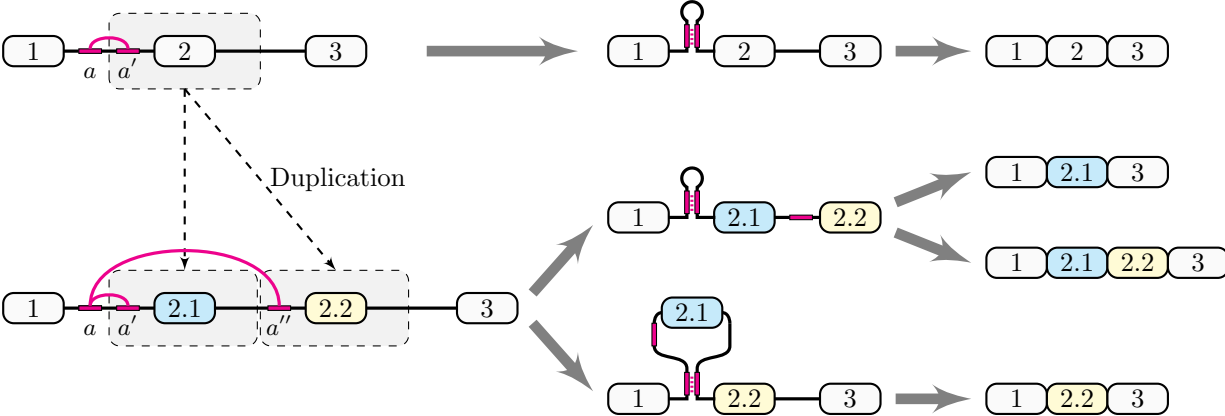

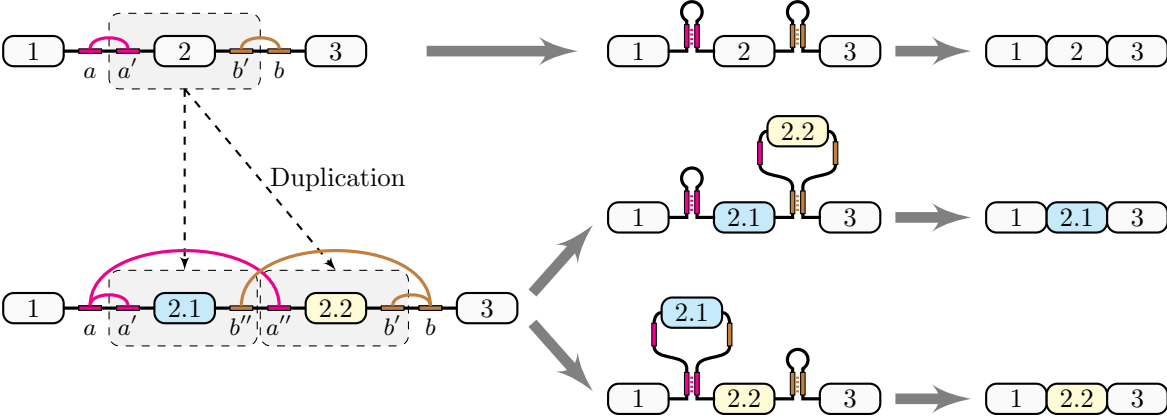

Supplement: s2 [file s2]

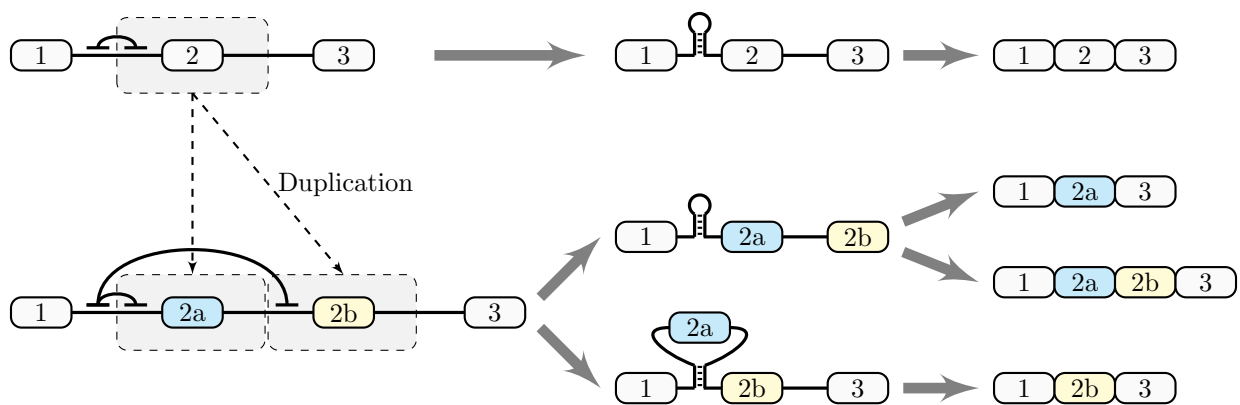

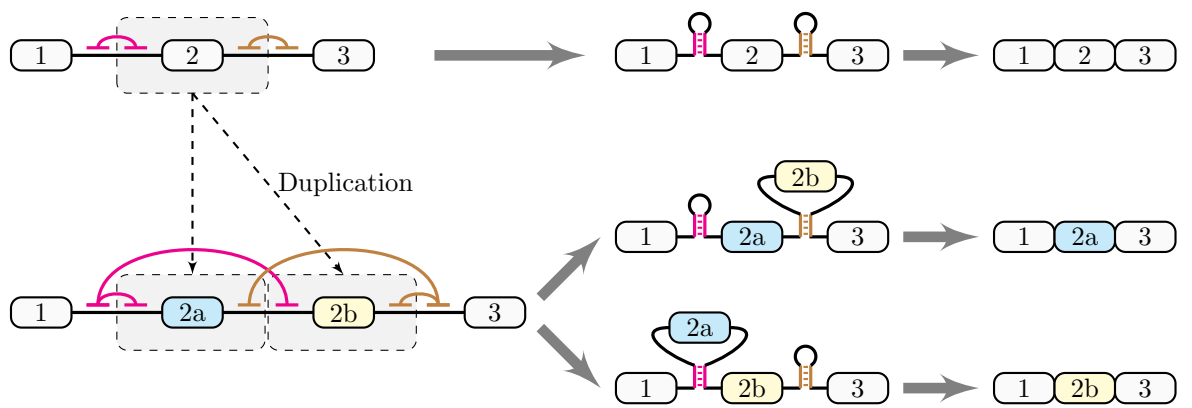

Supplement: s2 [file s2]

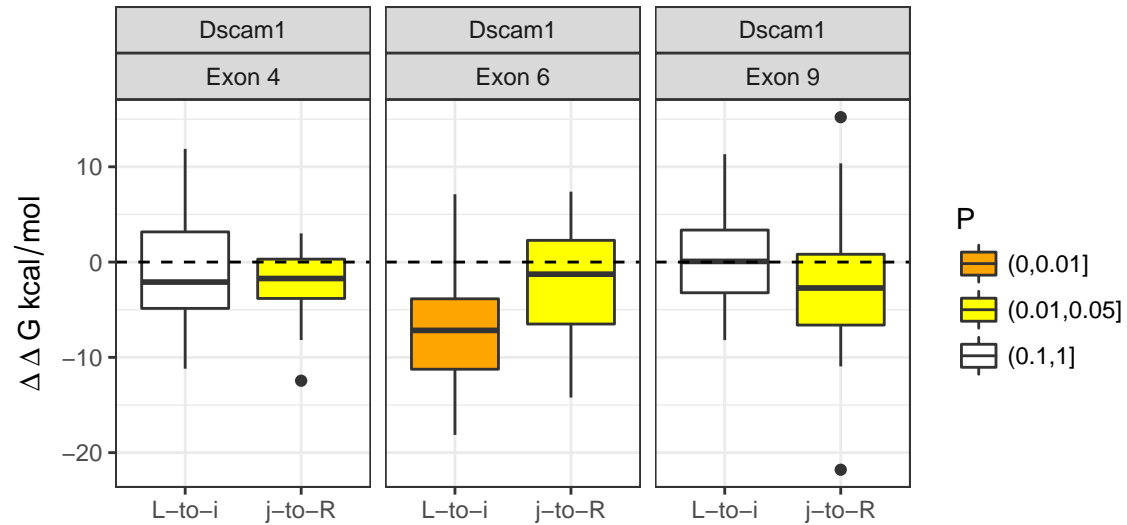

Supplement: s2 [file s2]

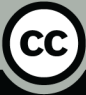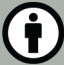

BY

Supplement: s2 [file s2]

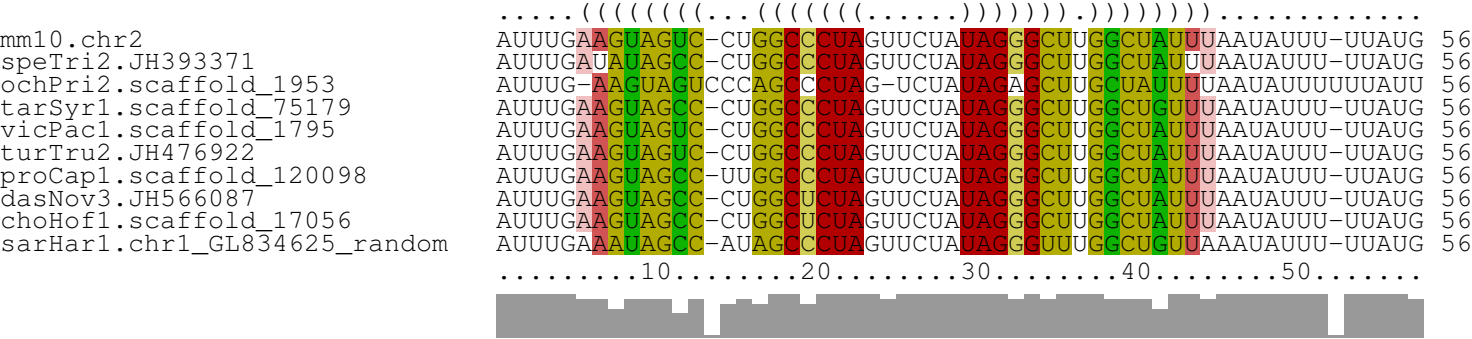

Supplement: s2 [file s2]

$\Delta$  Intron similarity

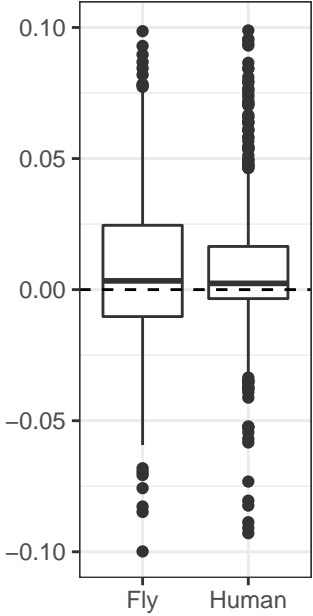

Supplement: s2 [file s2]

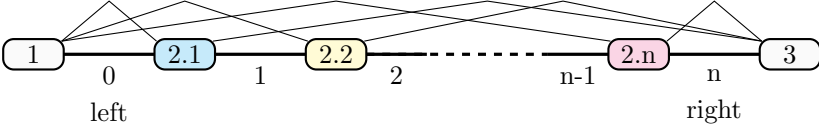

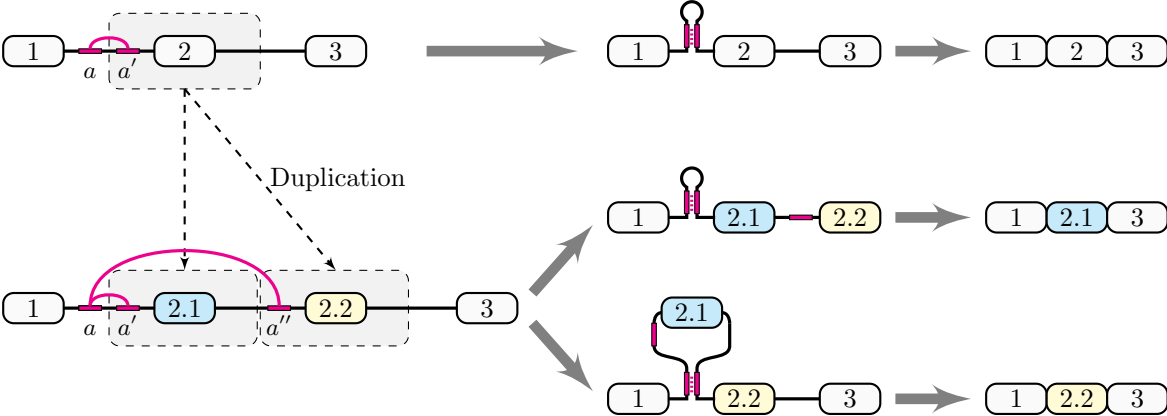



Supplement: s2 [file s2]

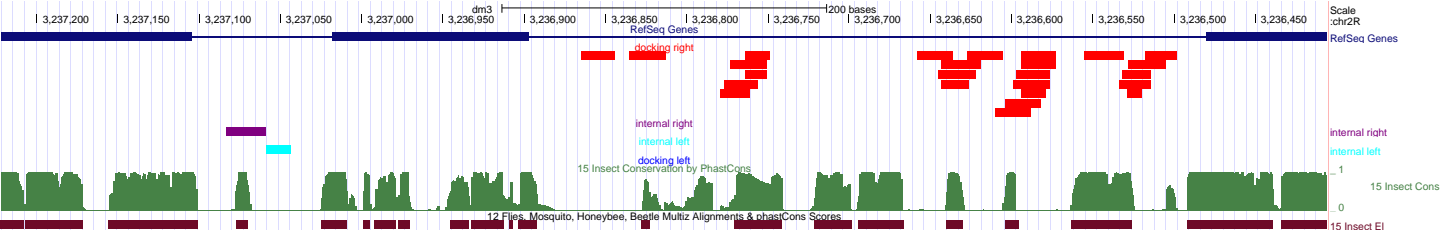

Supplement: s2 [file s2]

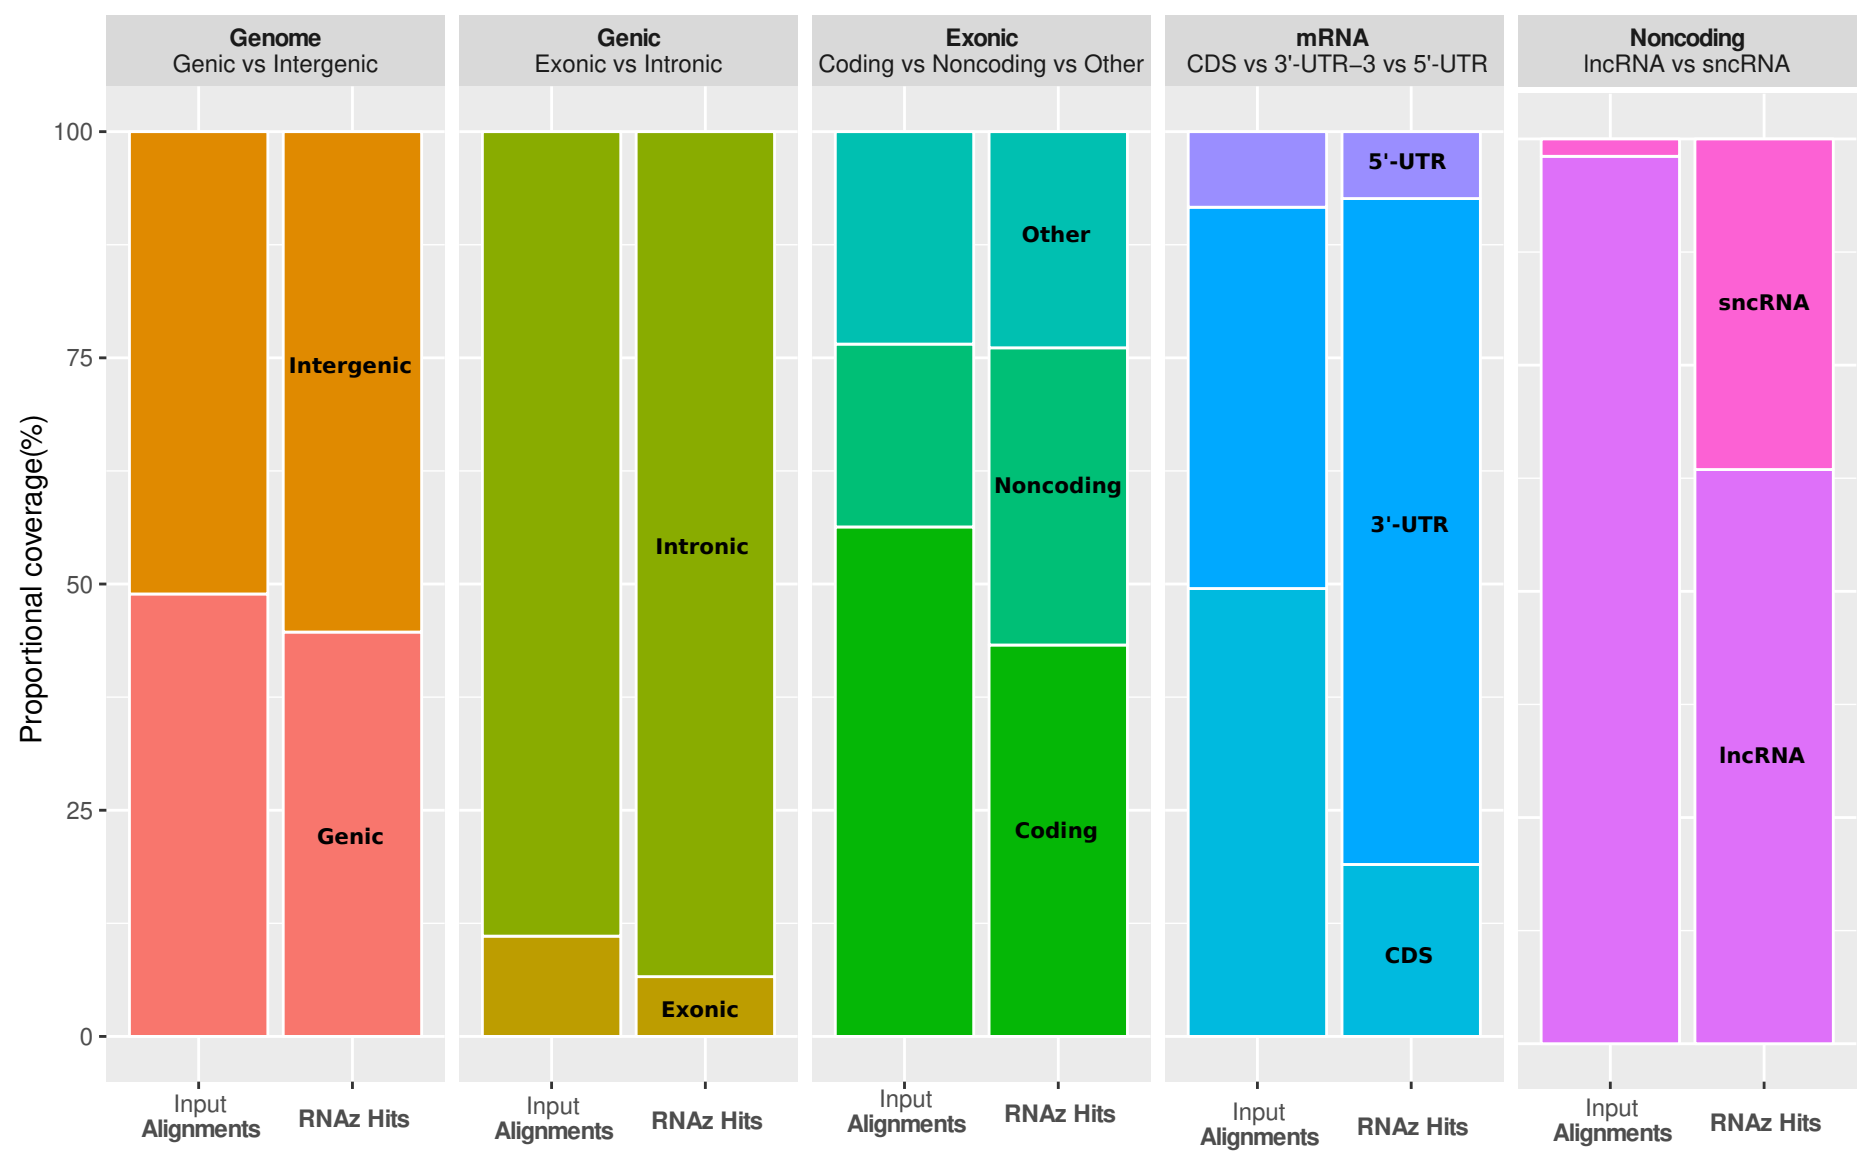

Supplement: s2 [file s2]
